# Supplementary material
Source: PubMed Central journal article supplement (PMC5467195)

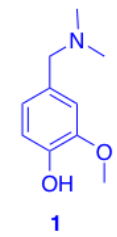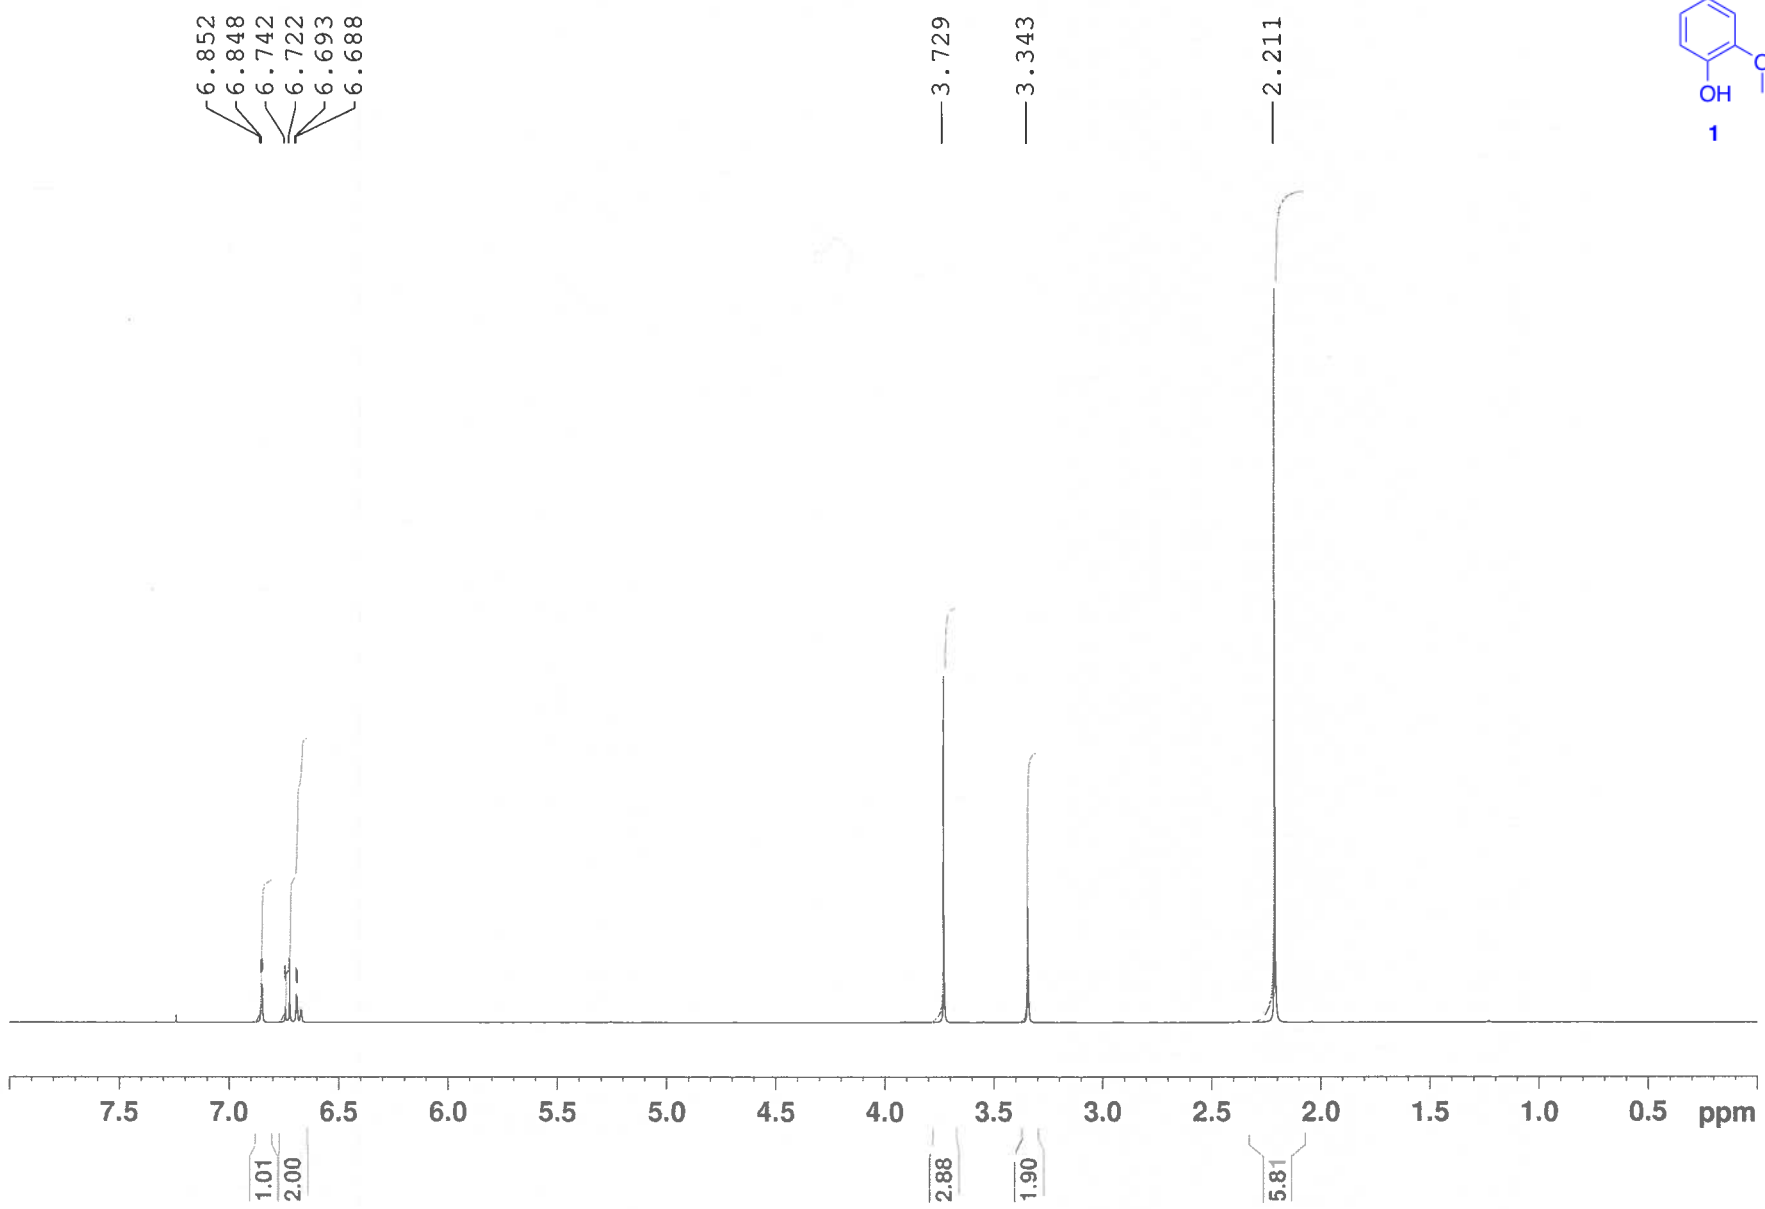

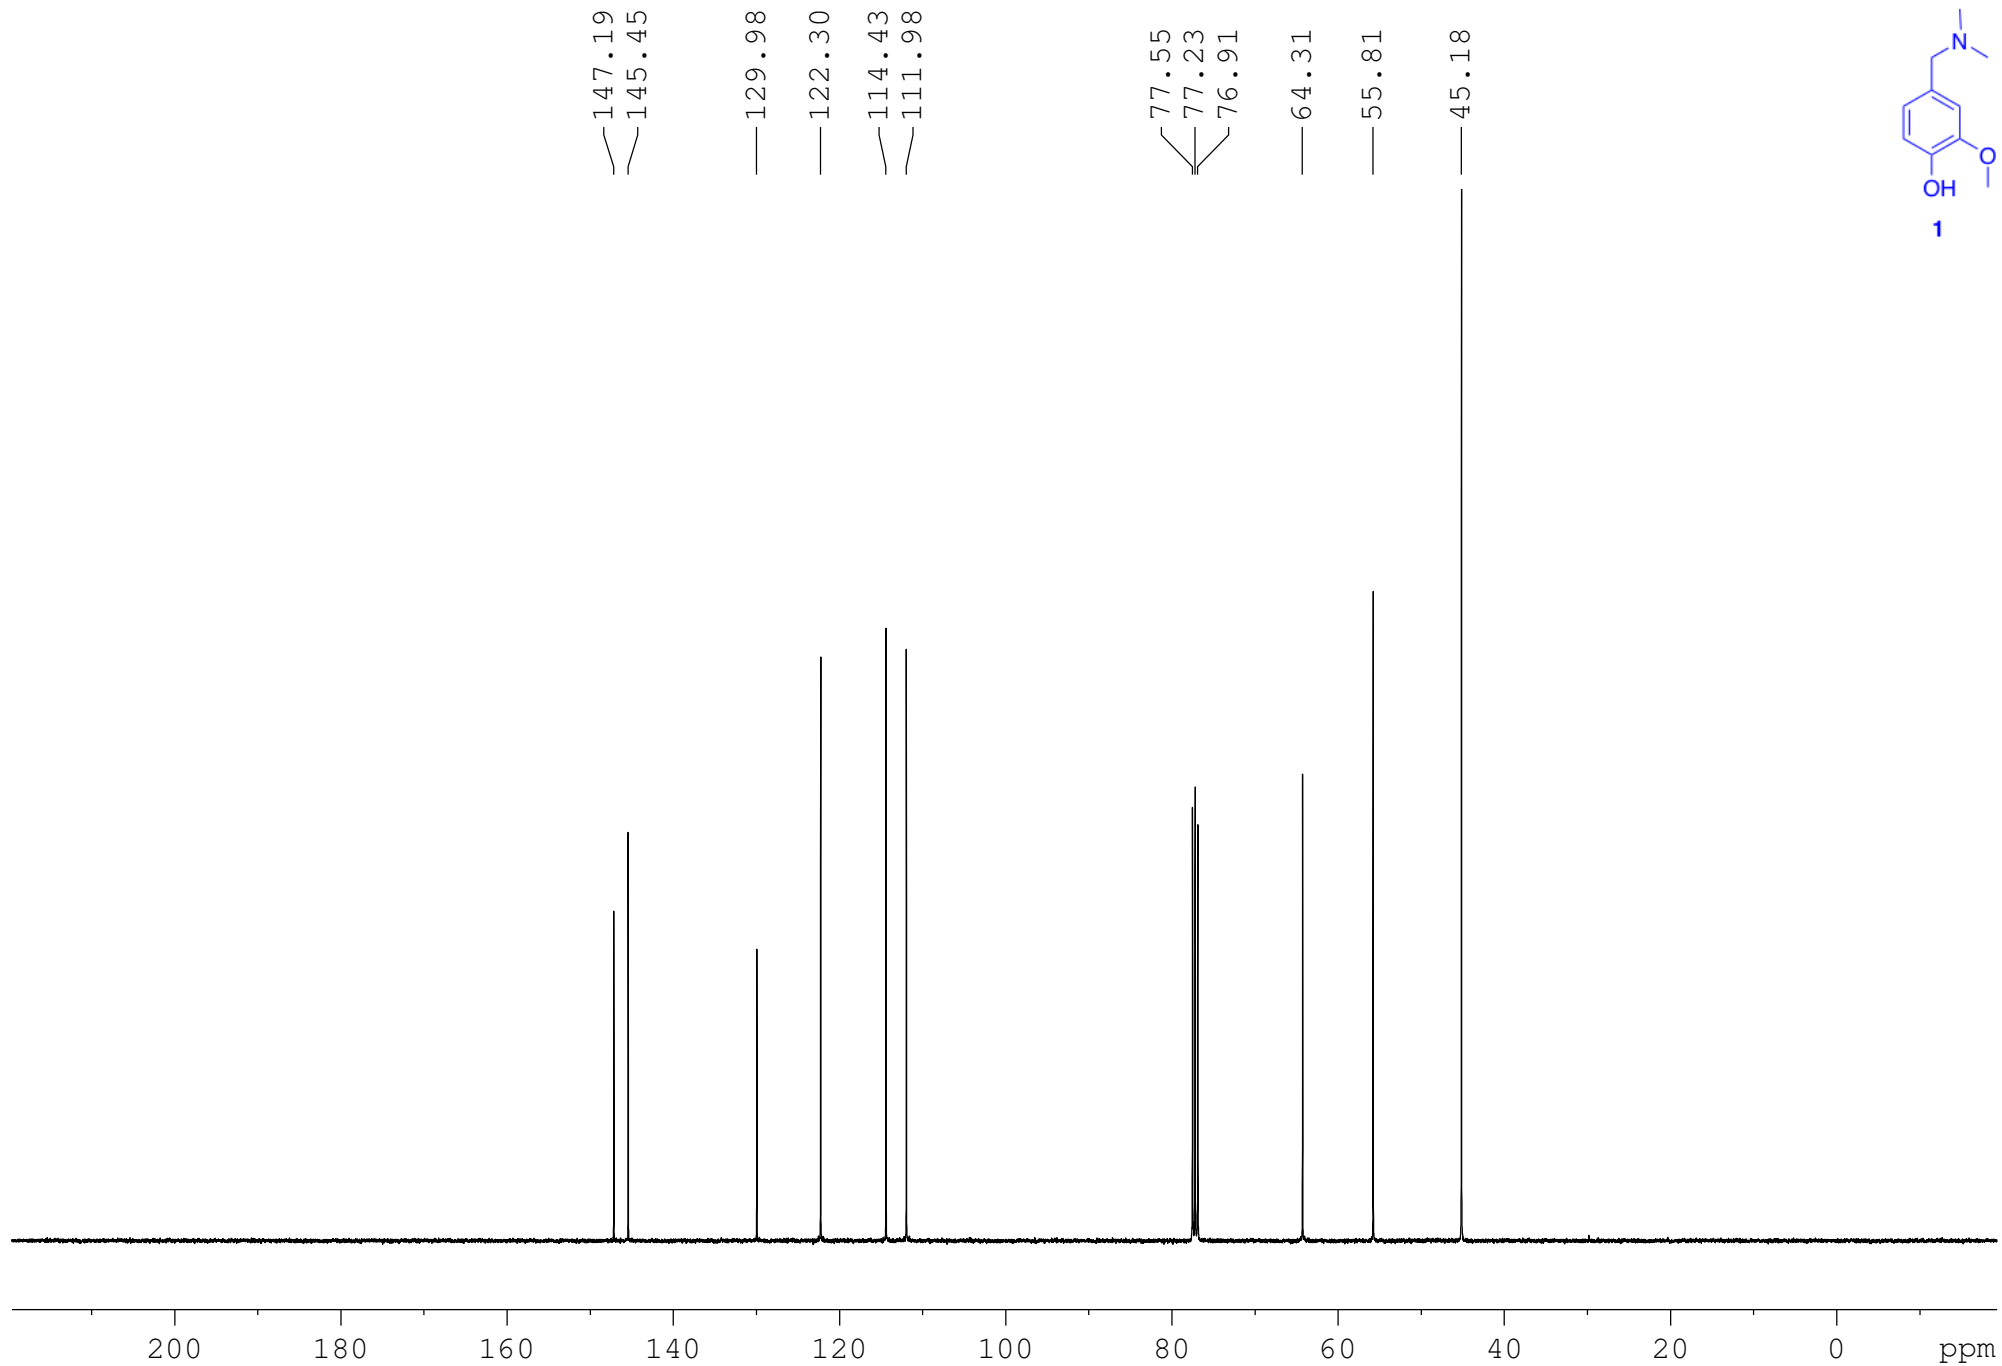

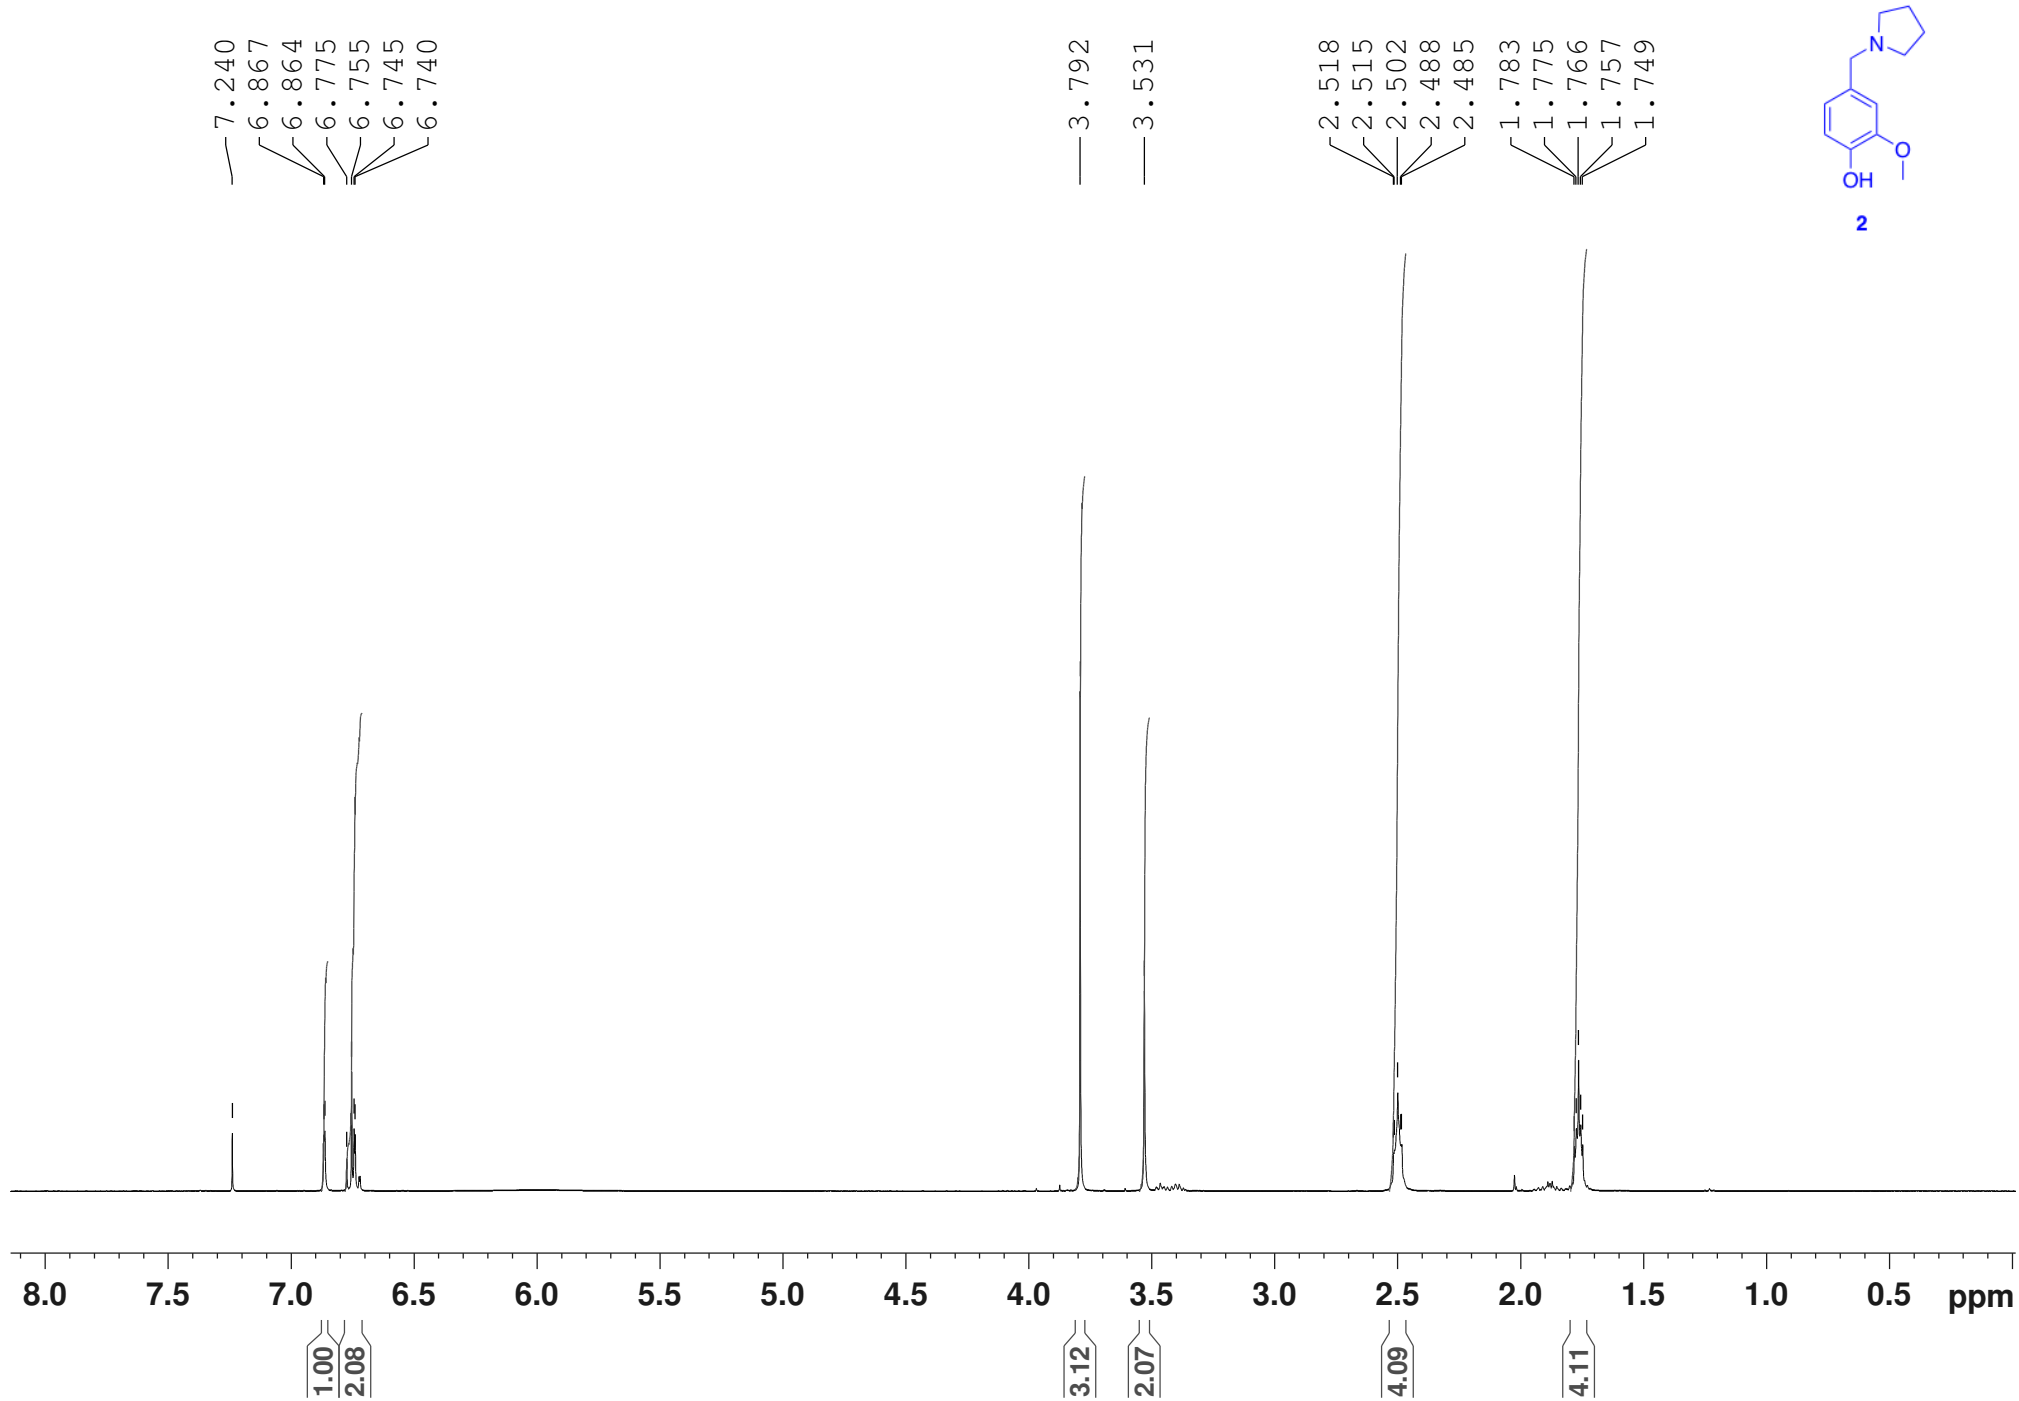

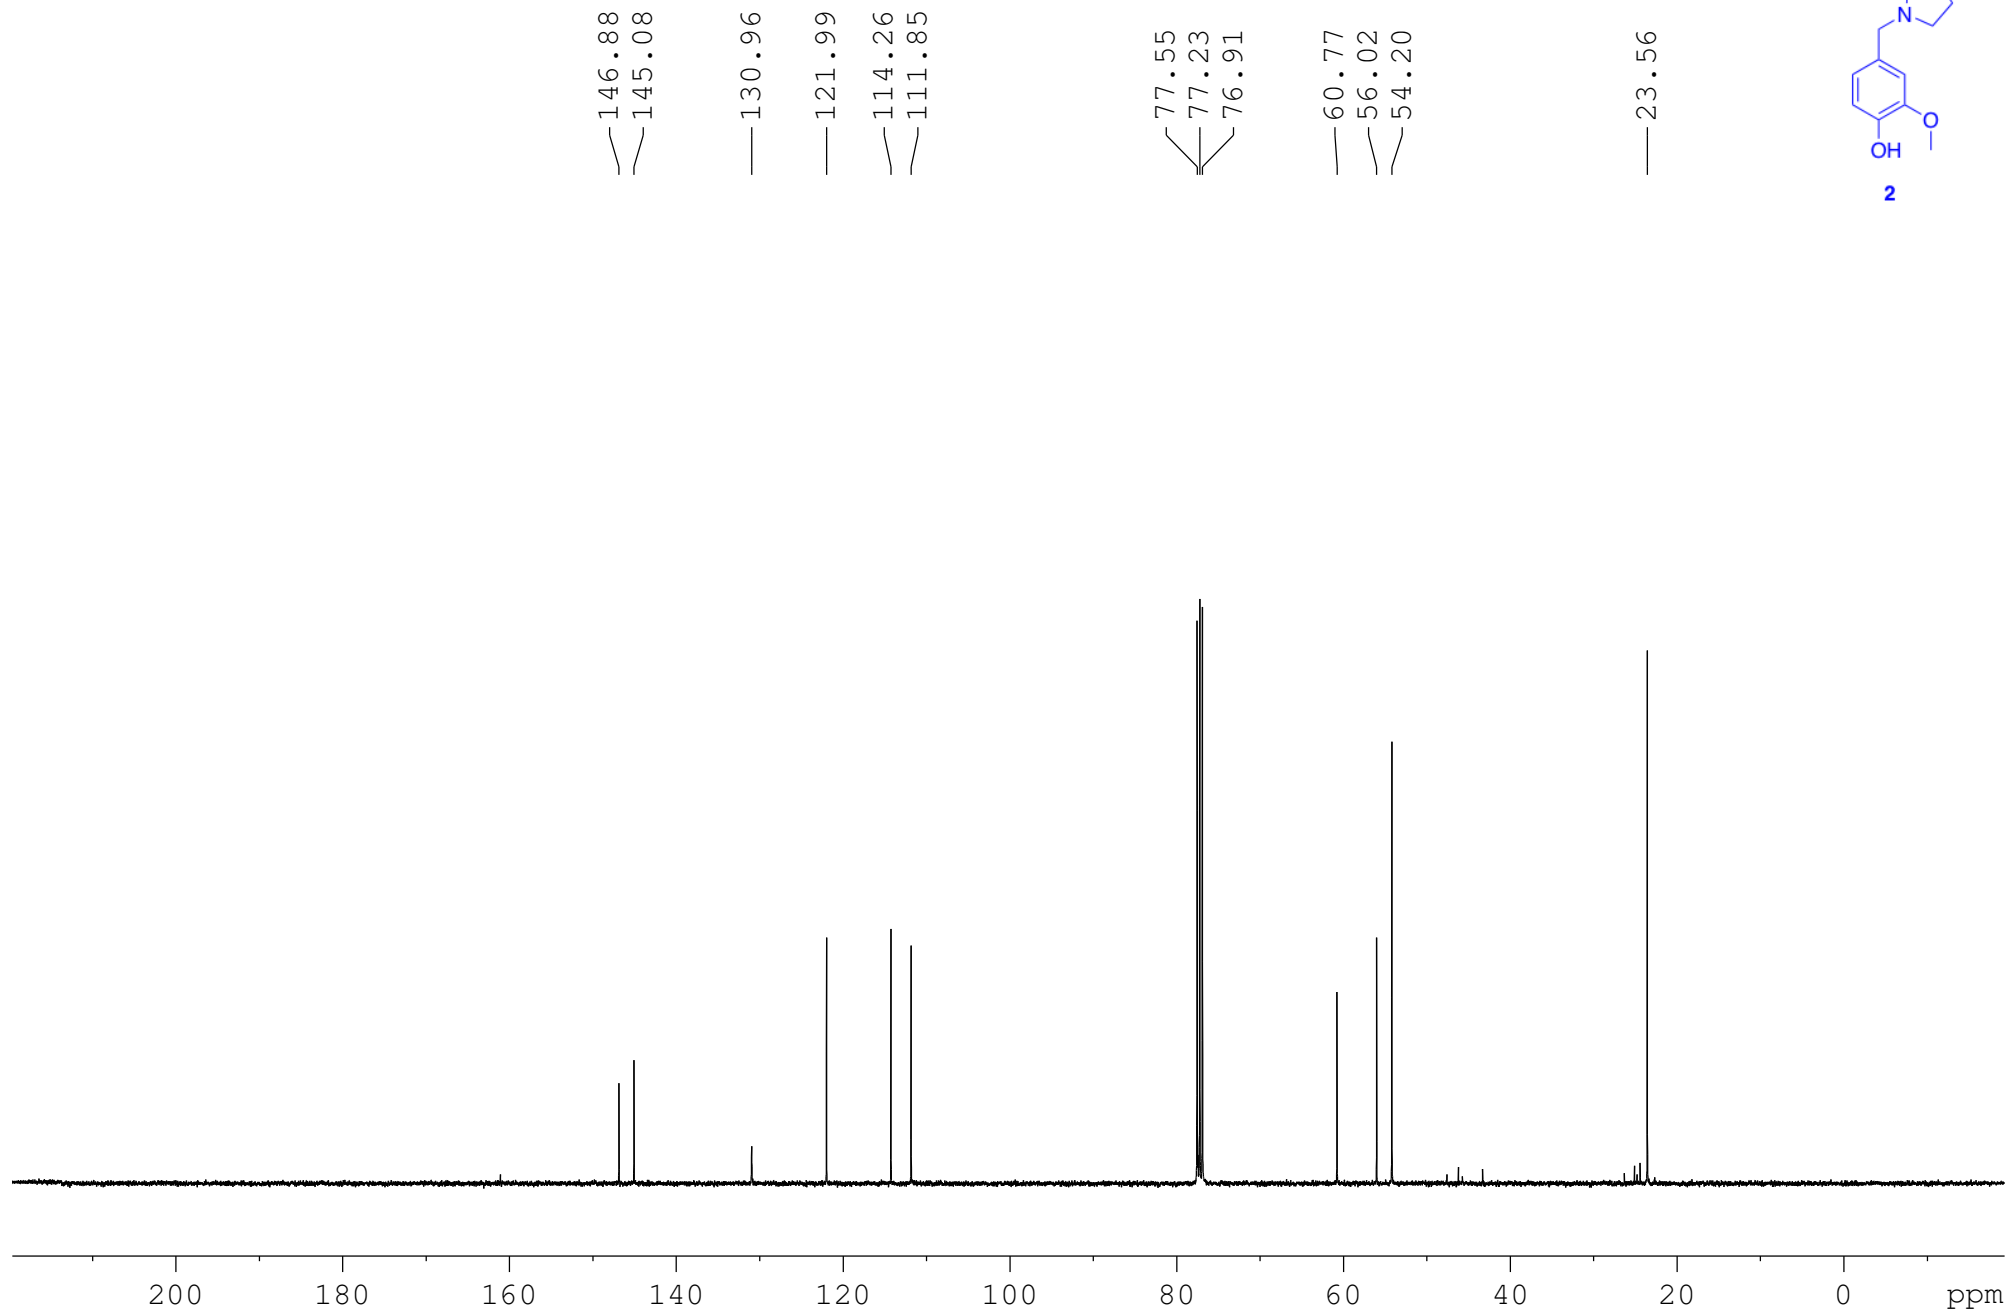

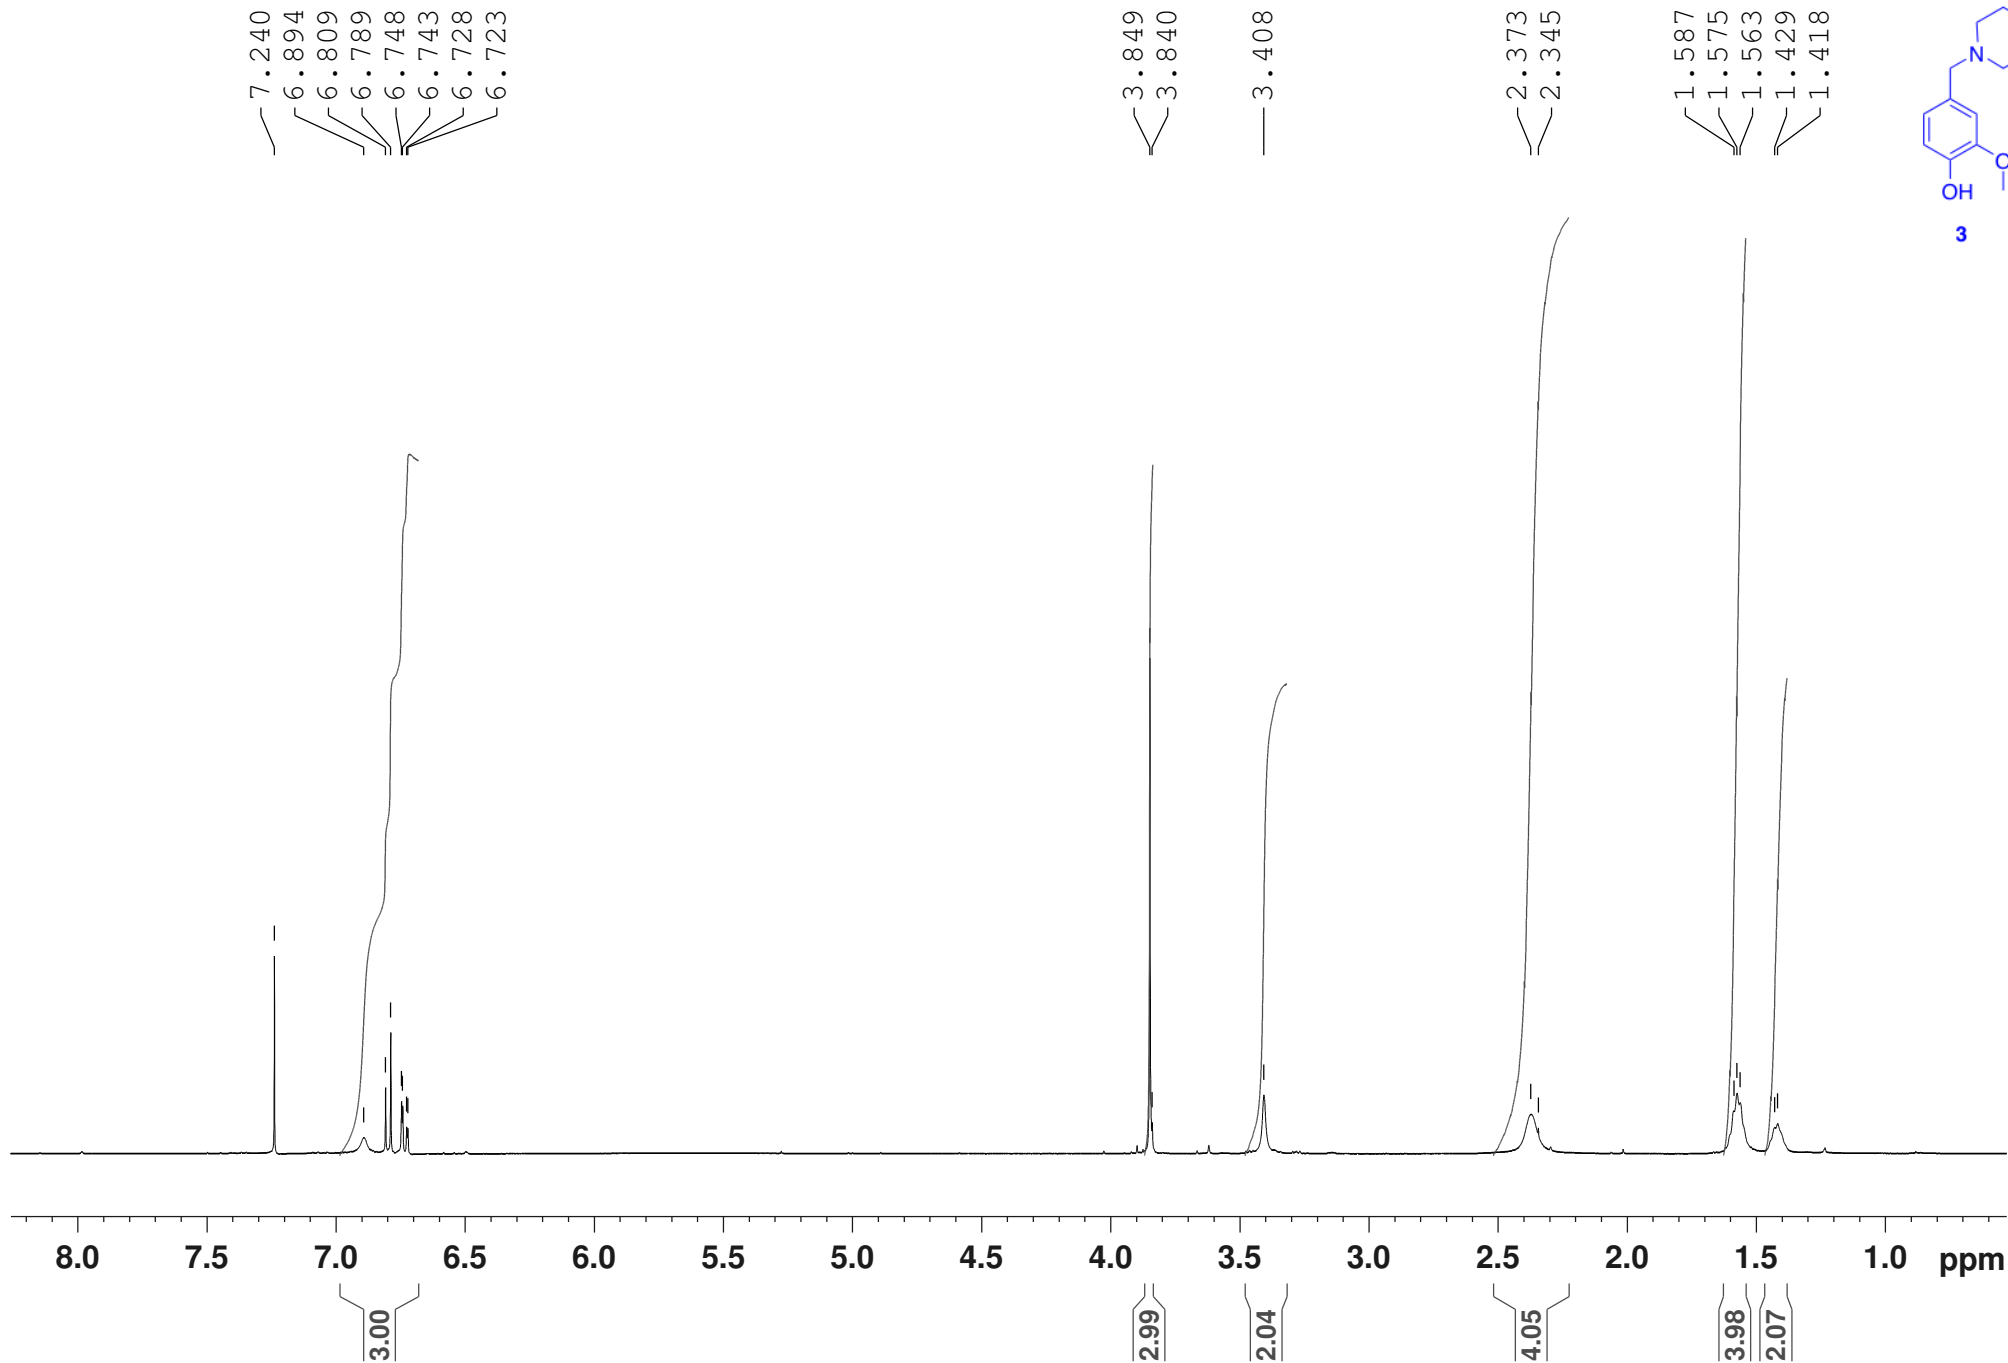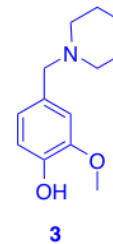

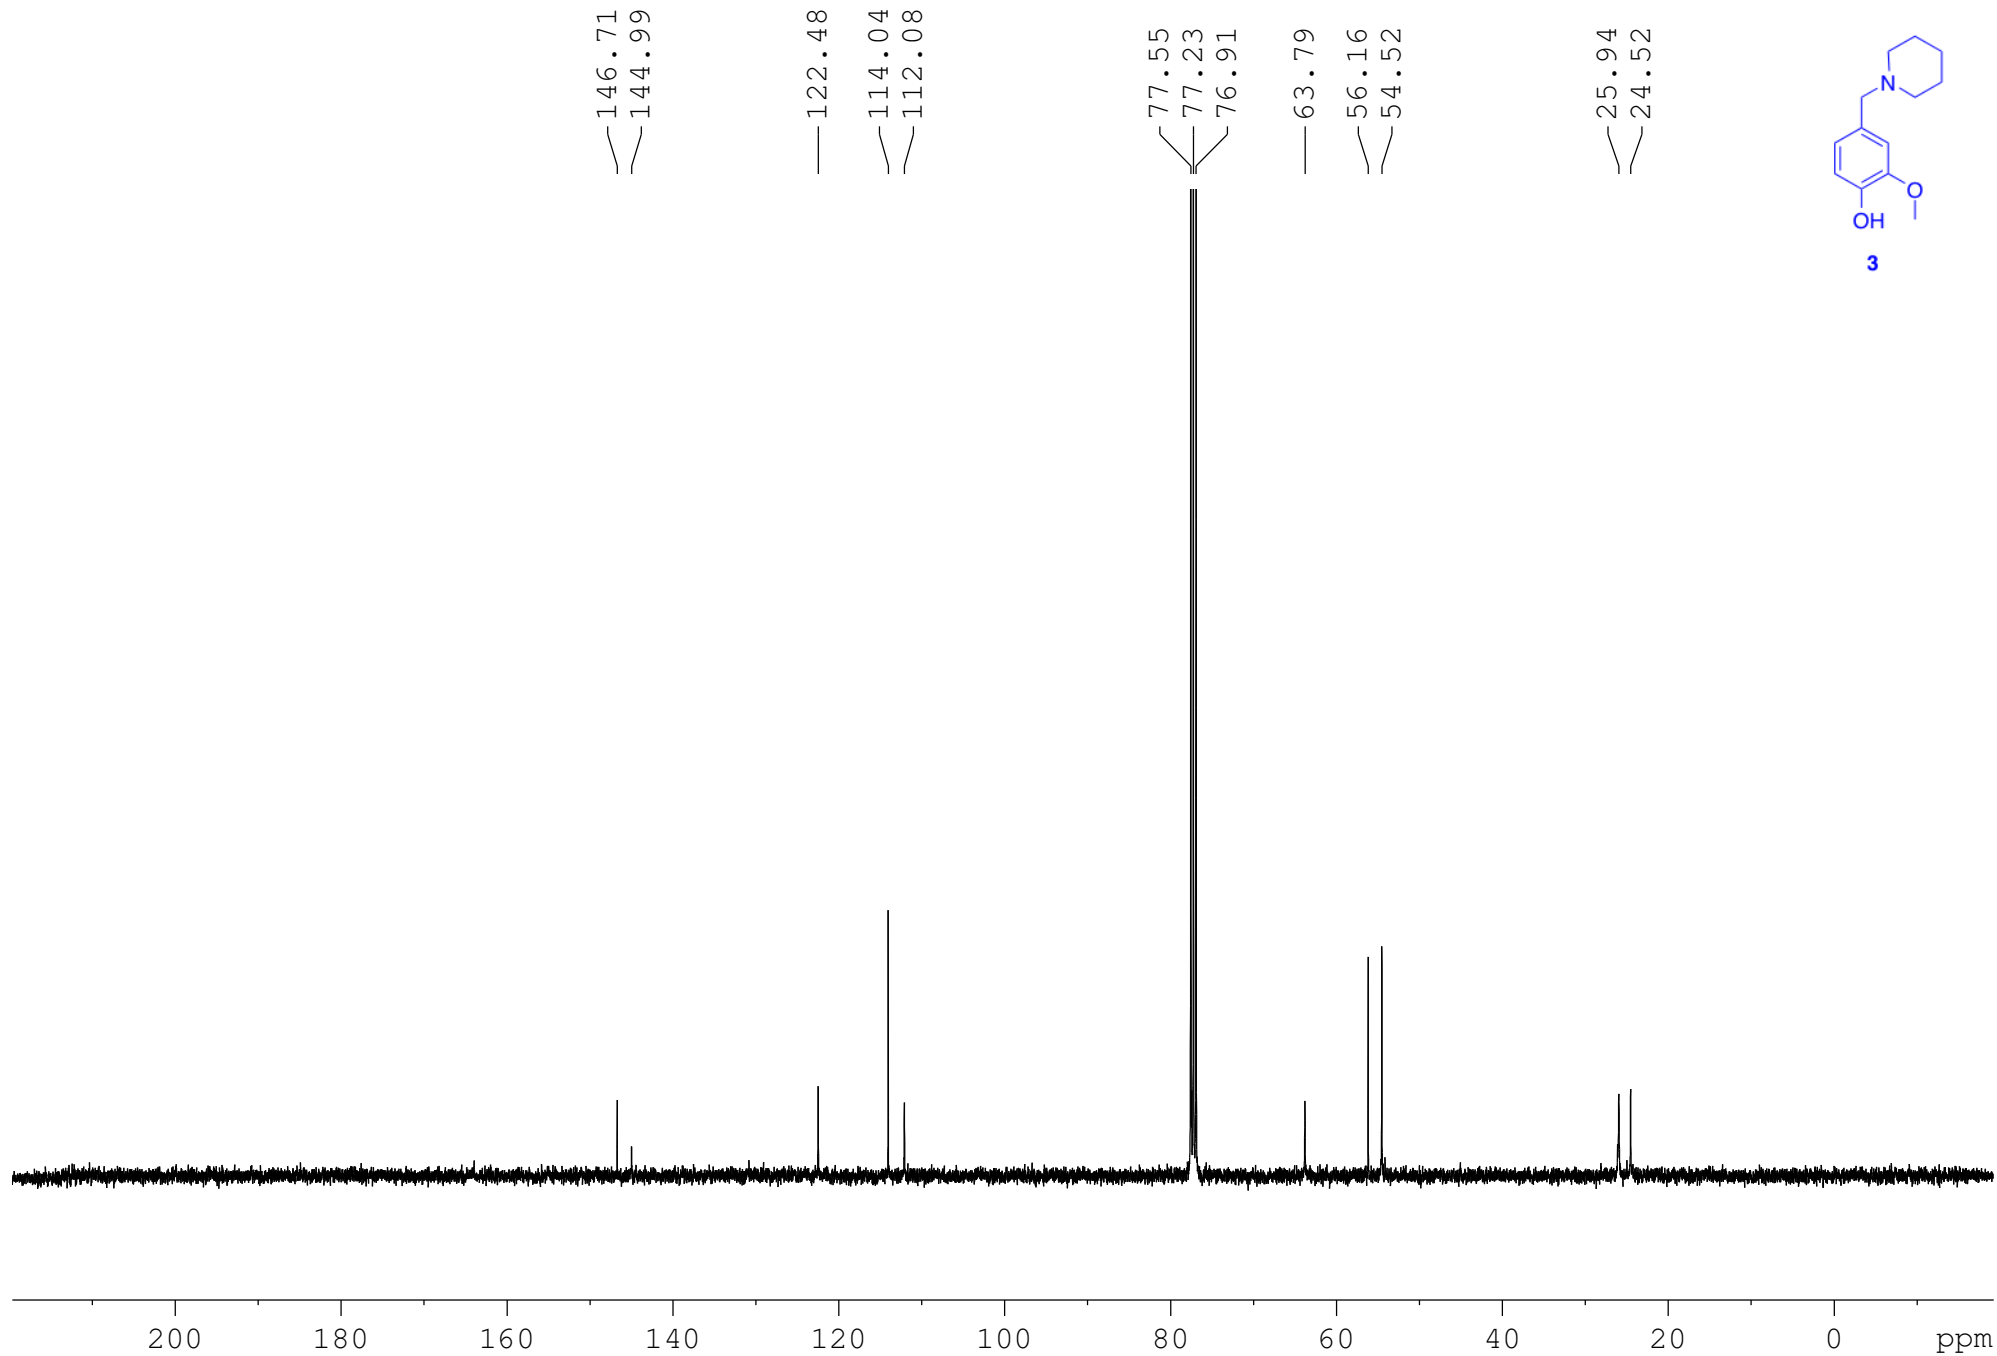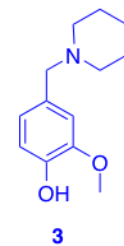

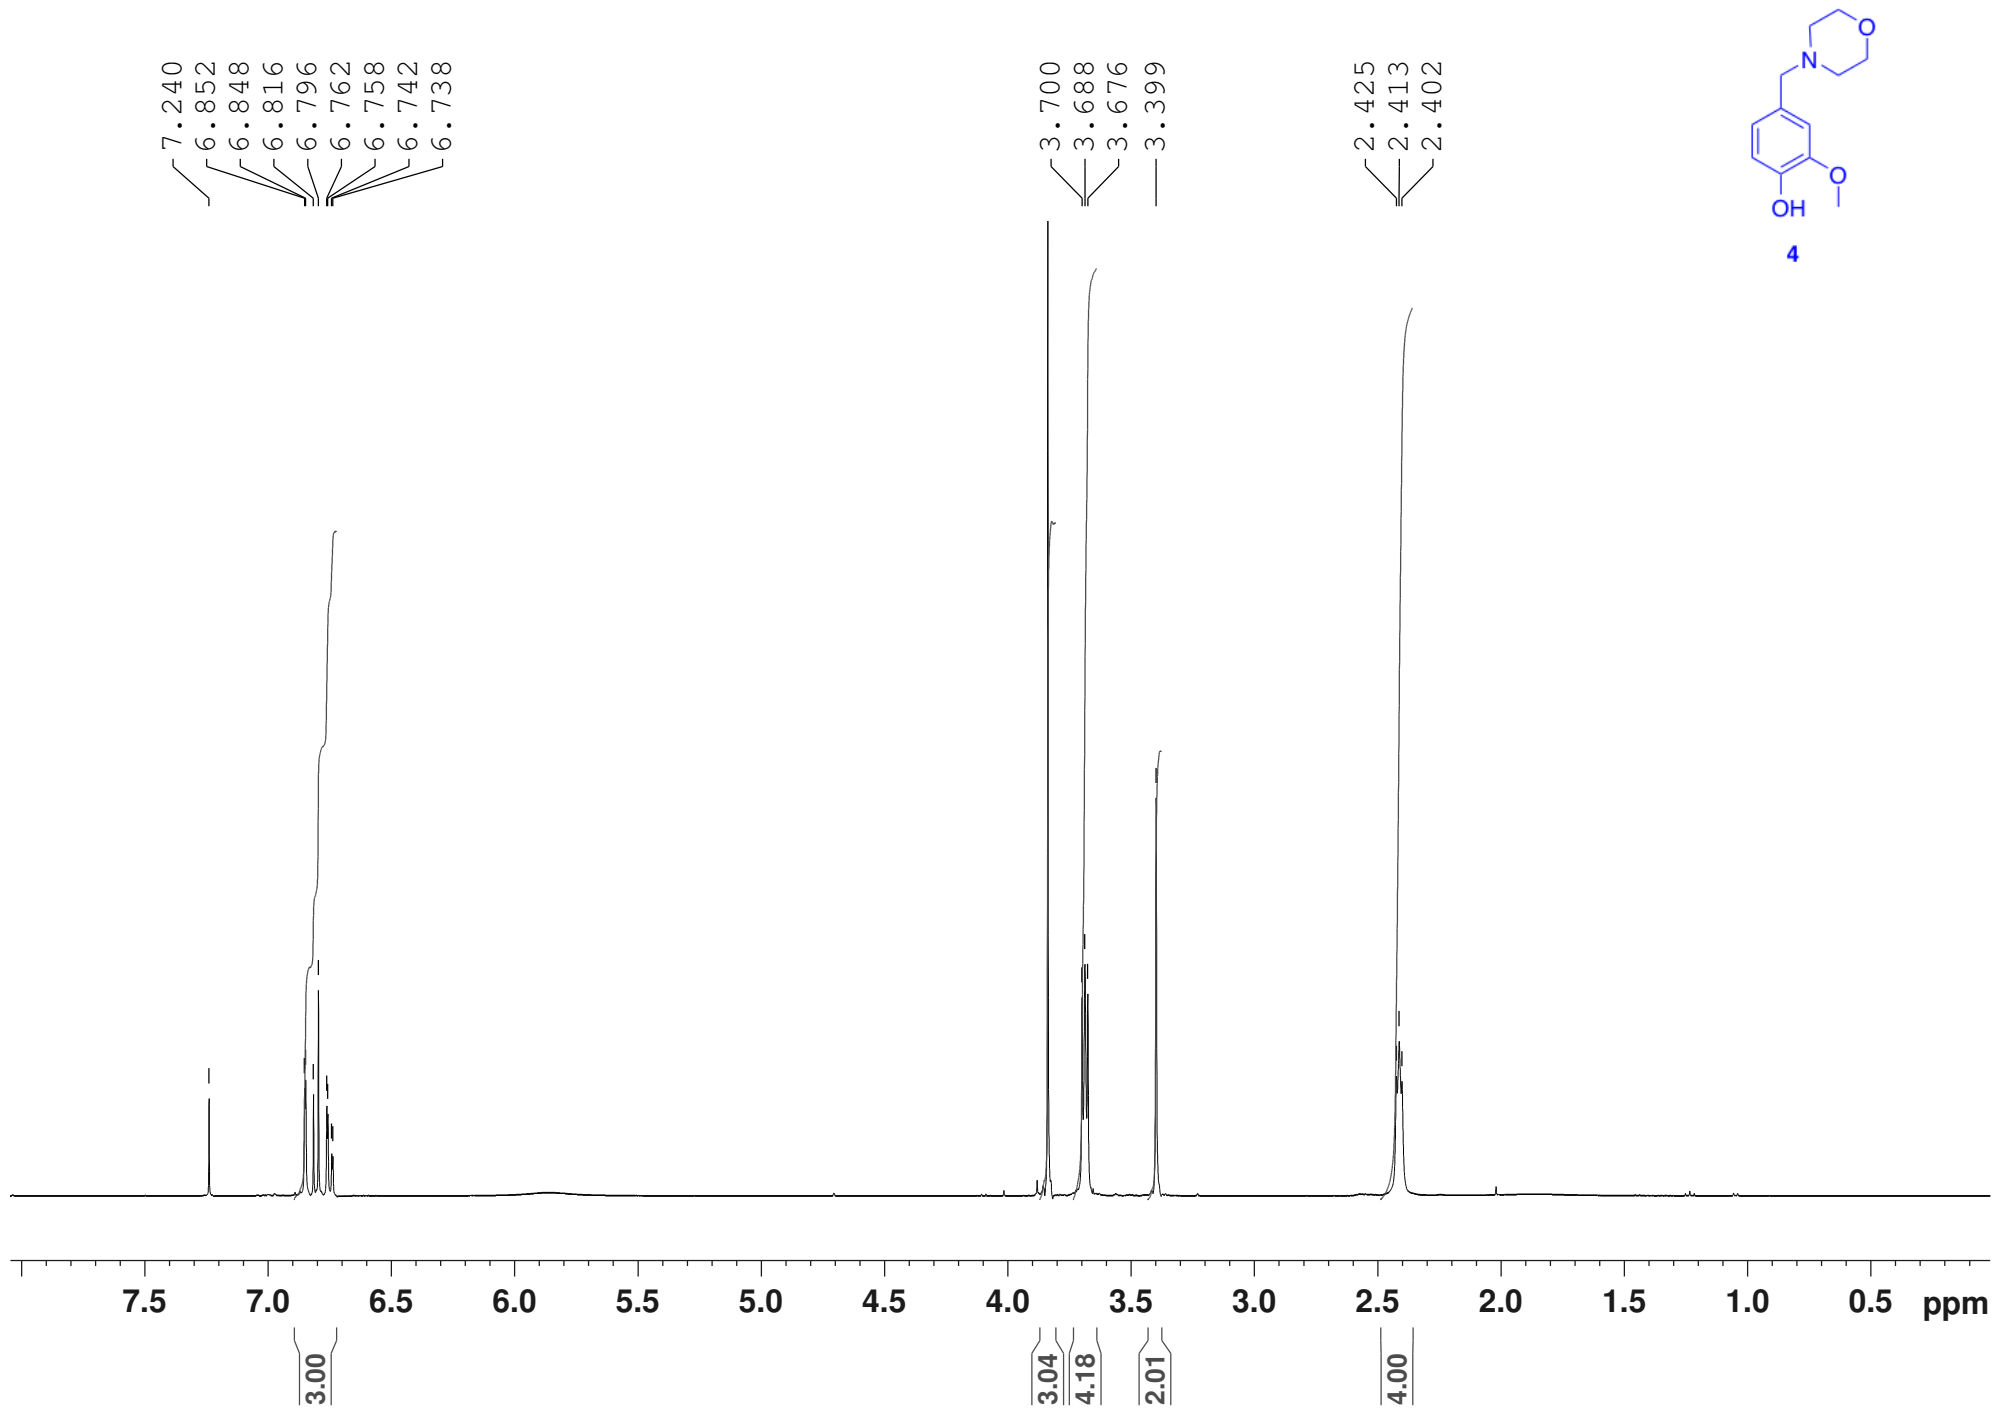

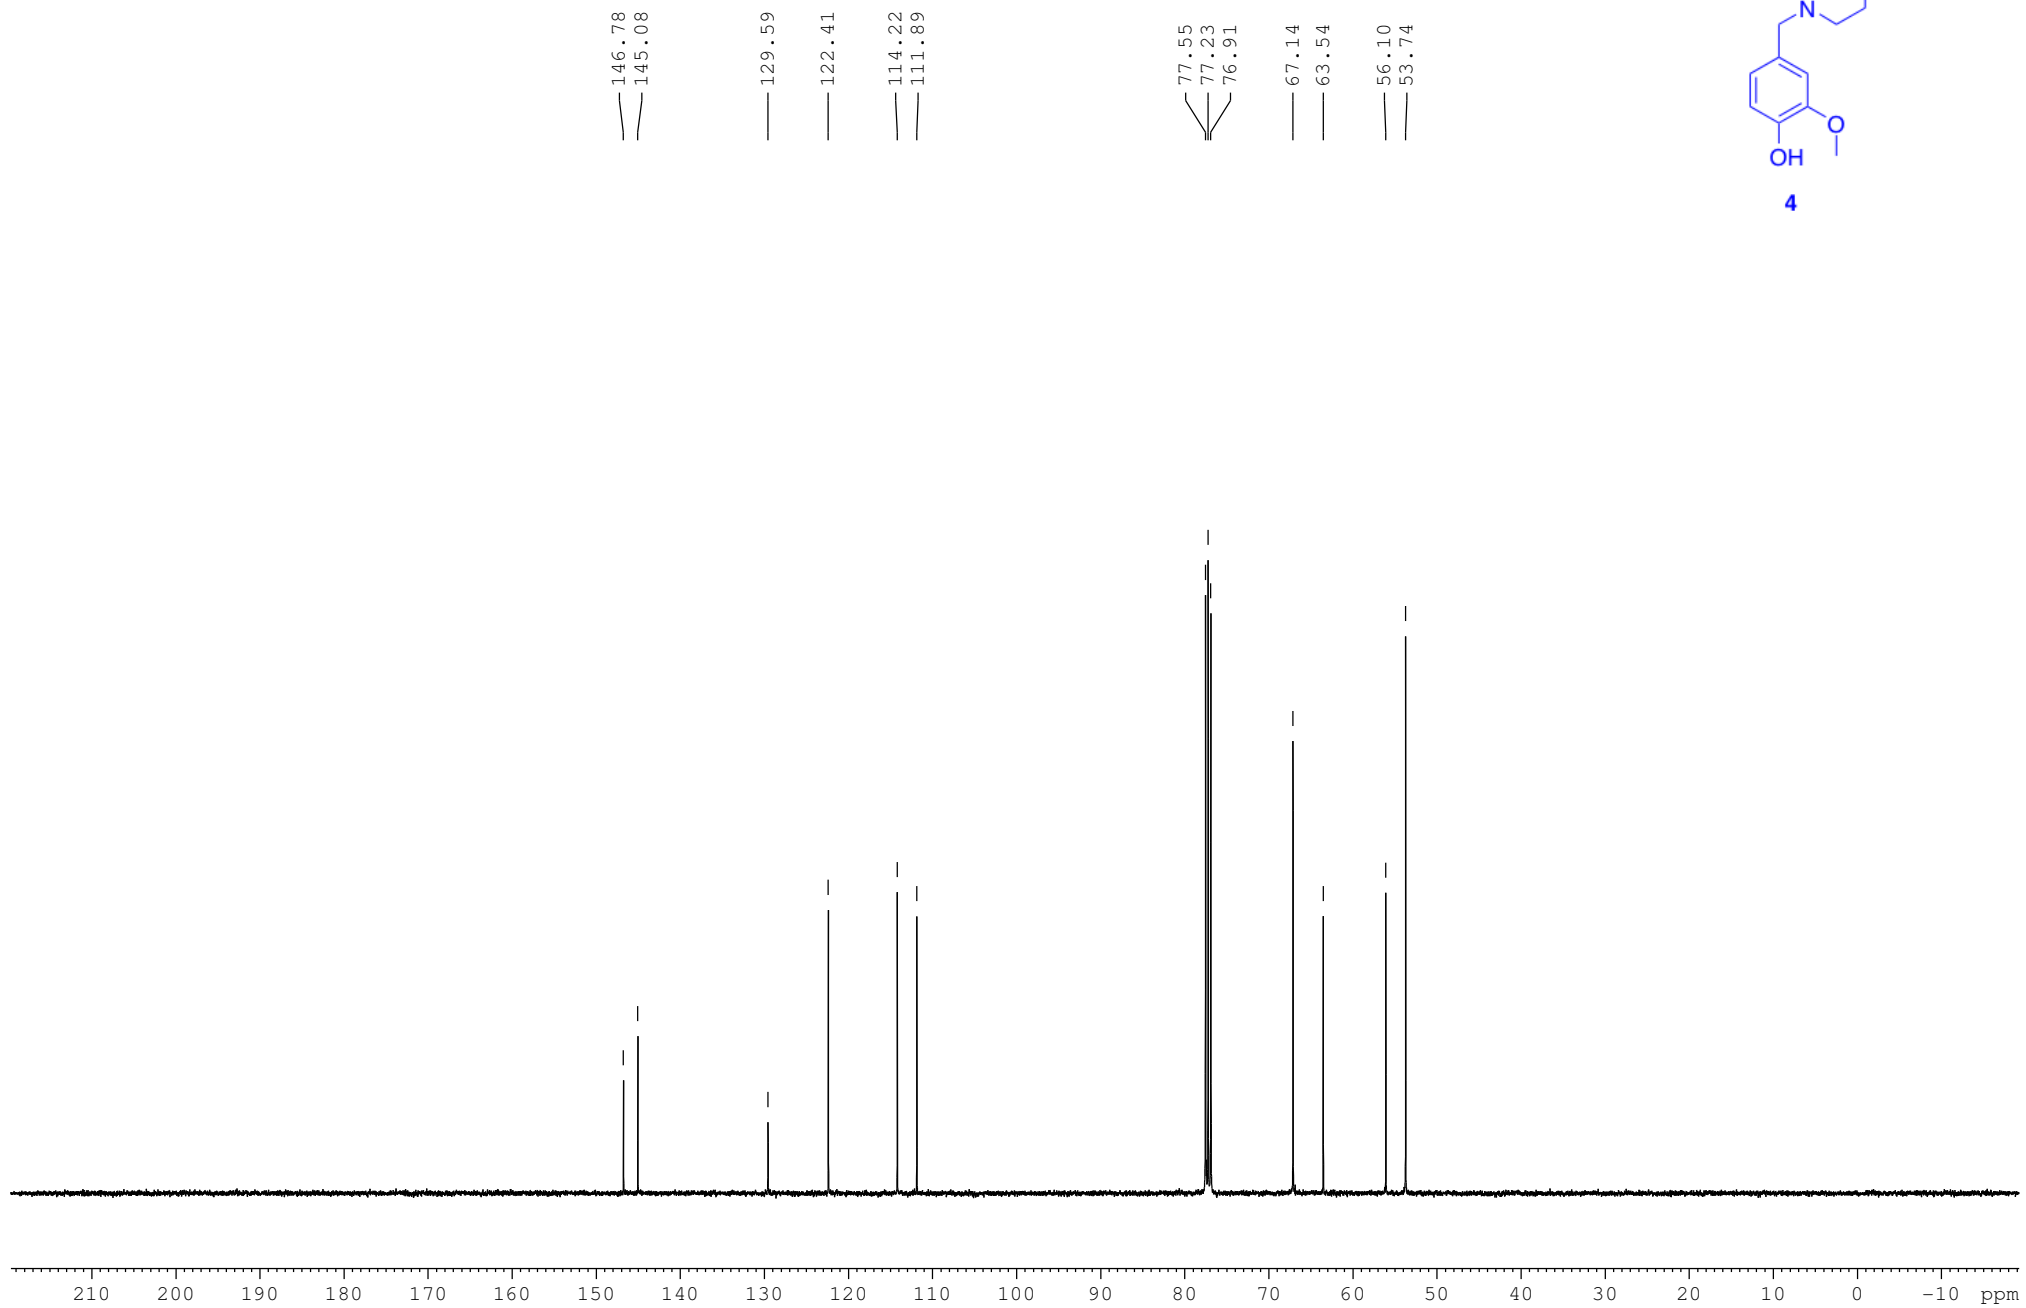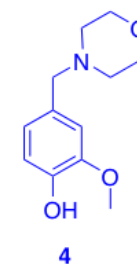



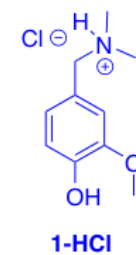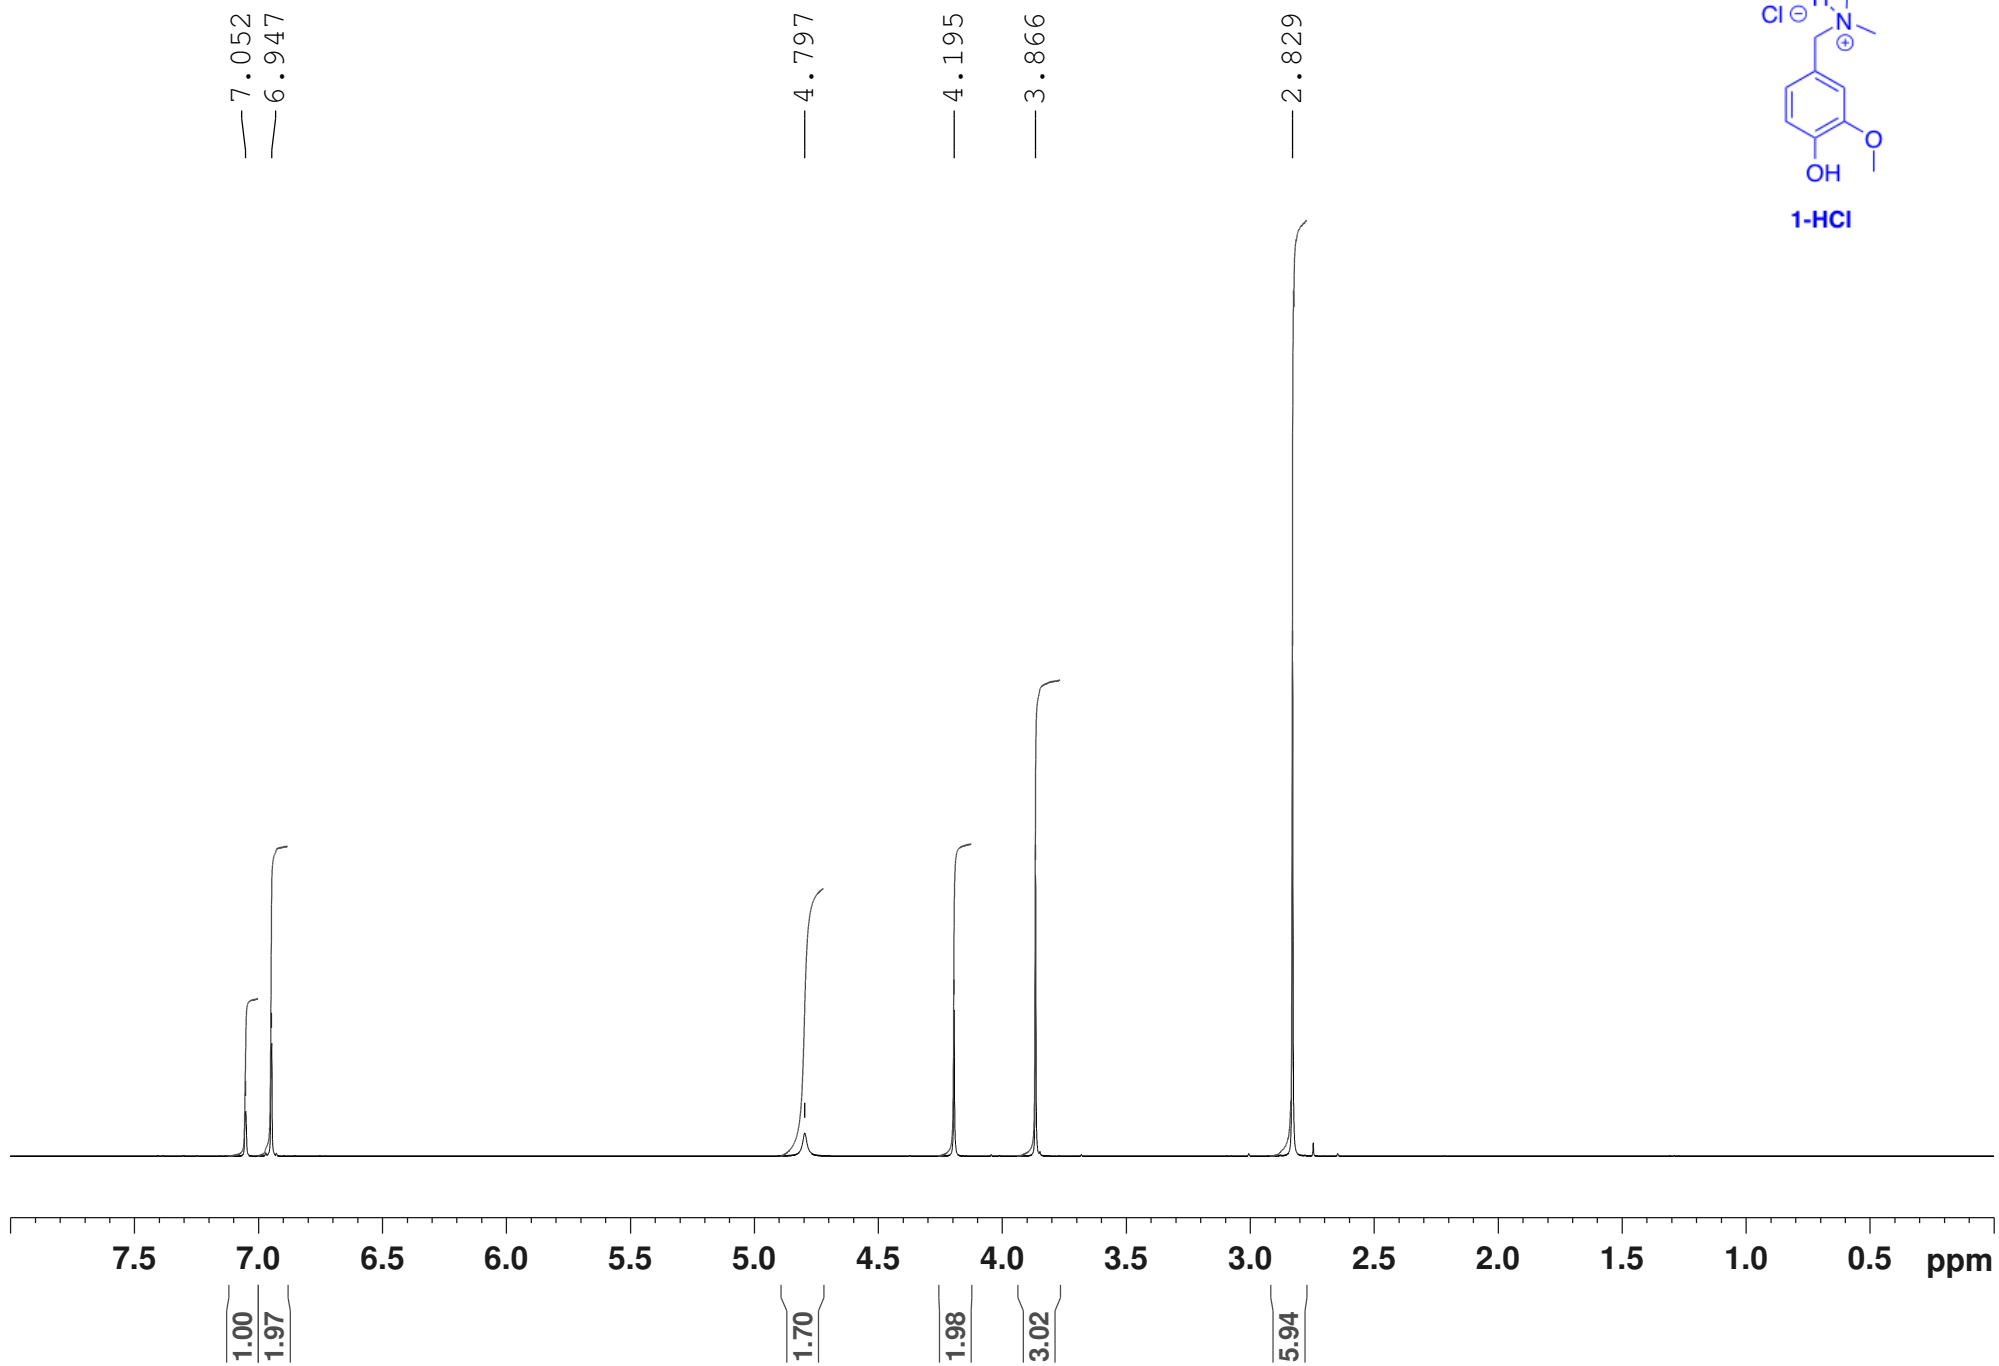

150.11  
148.86

126.77  
124.05

118.19  
117.00

63.46  
58.44

44.34

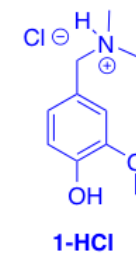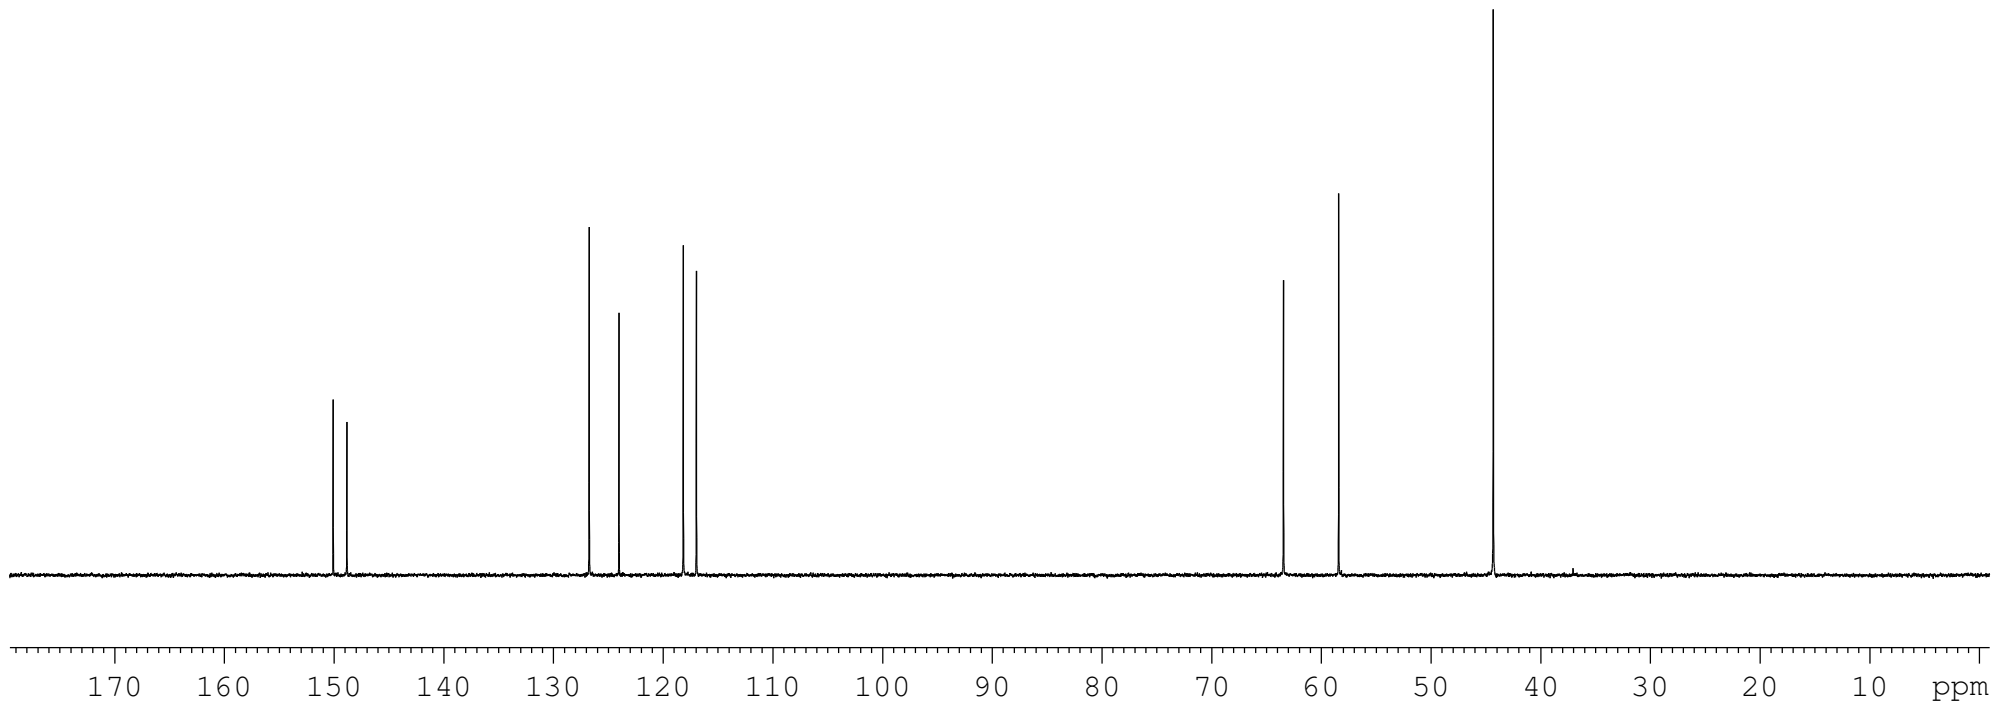

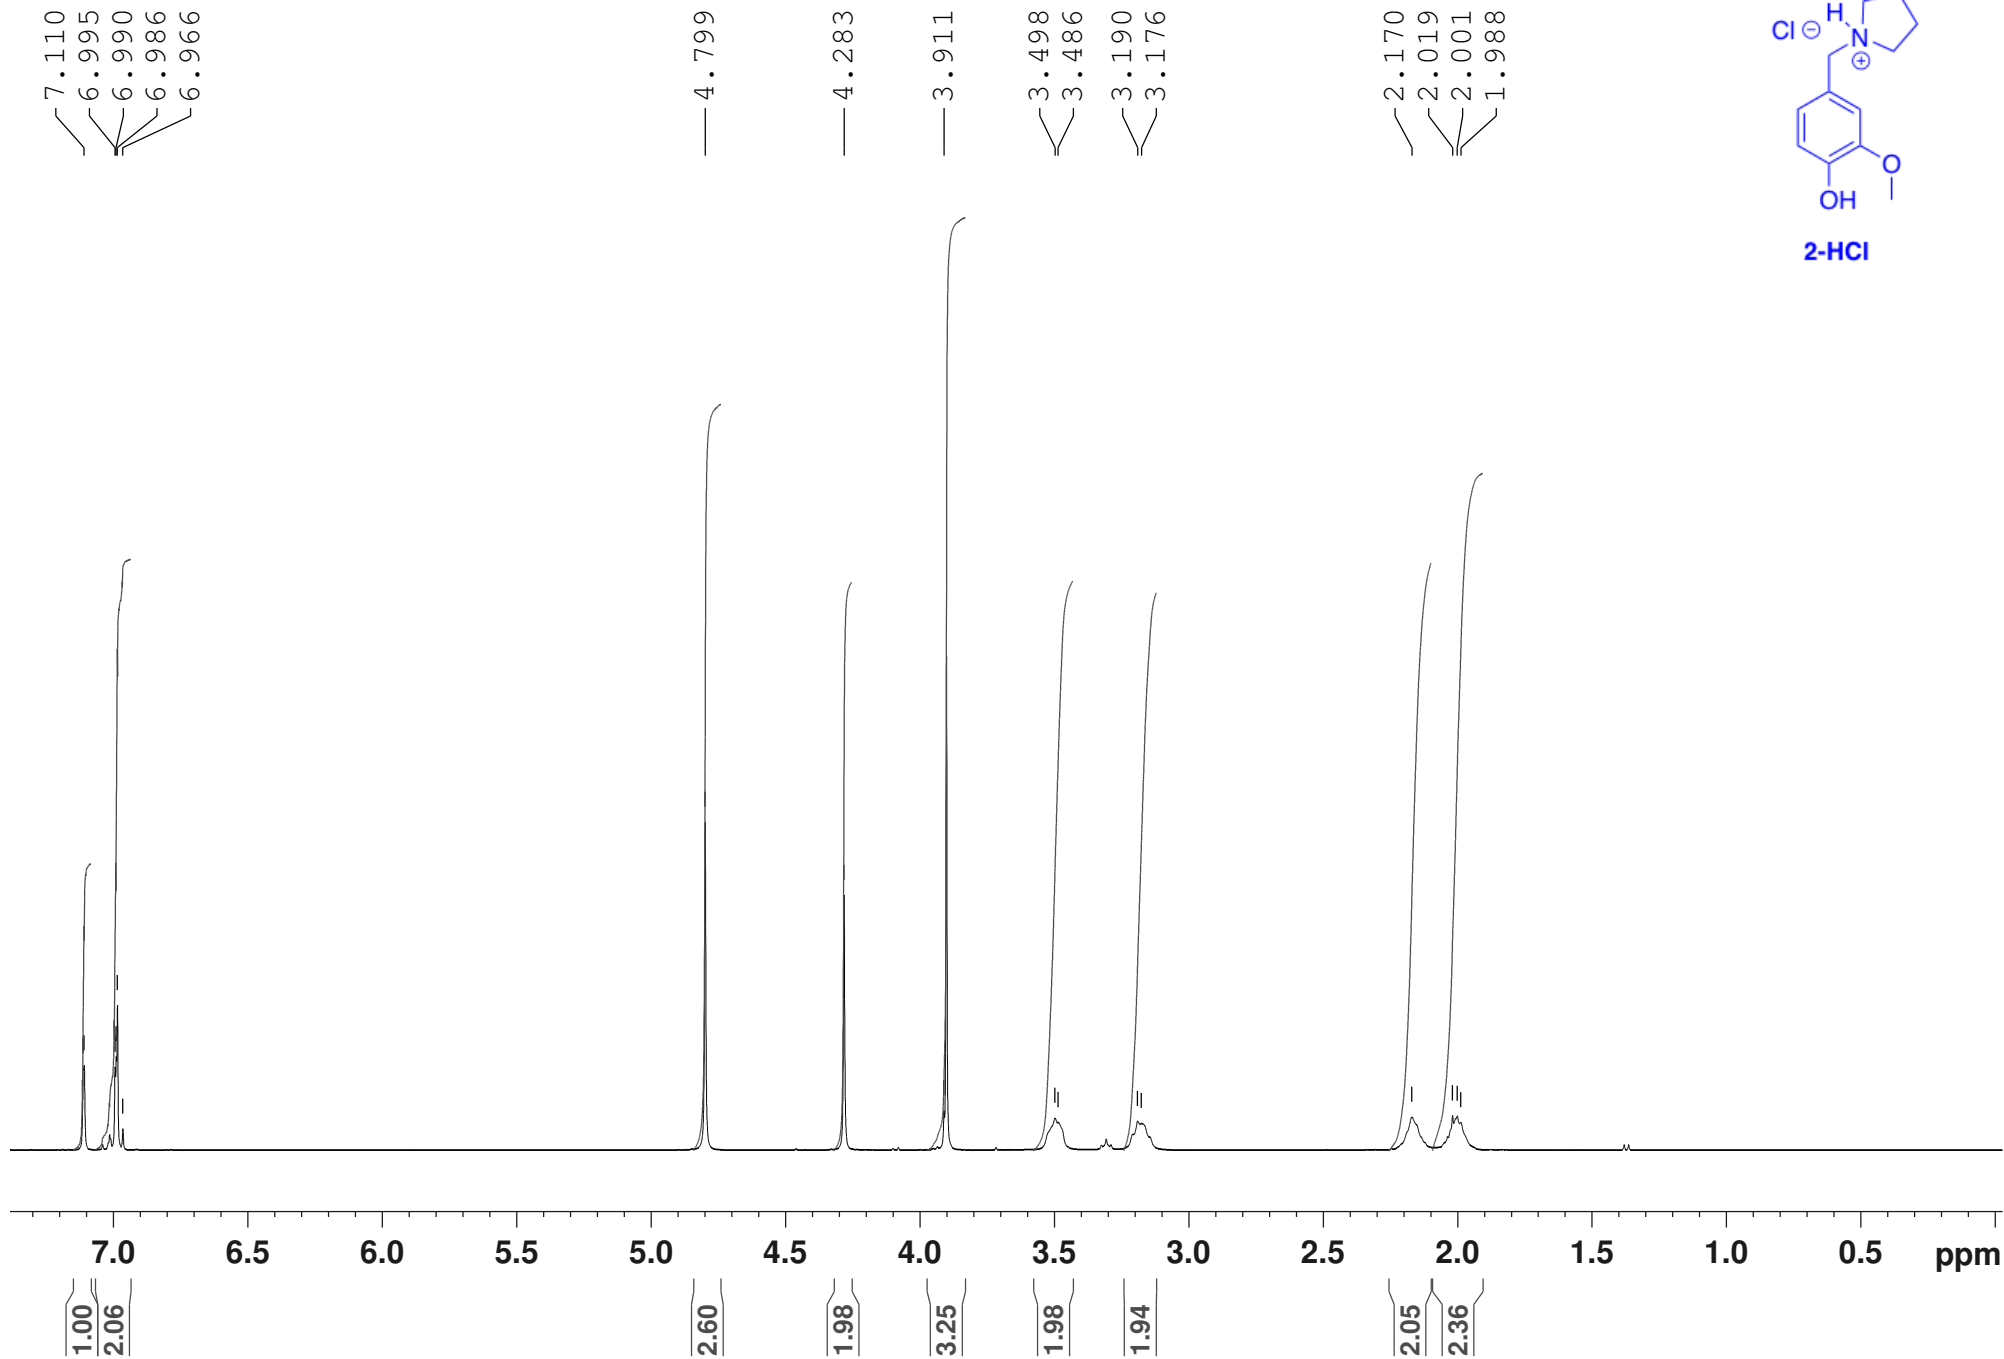



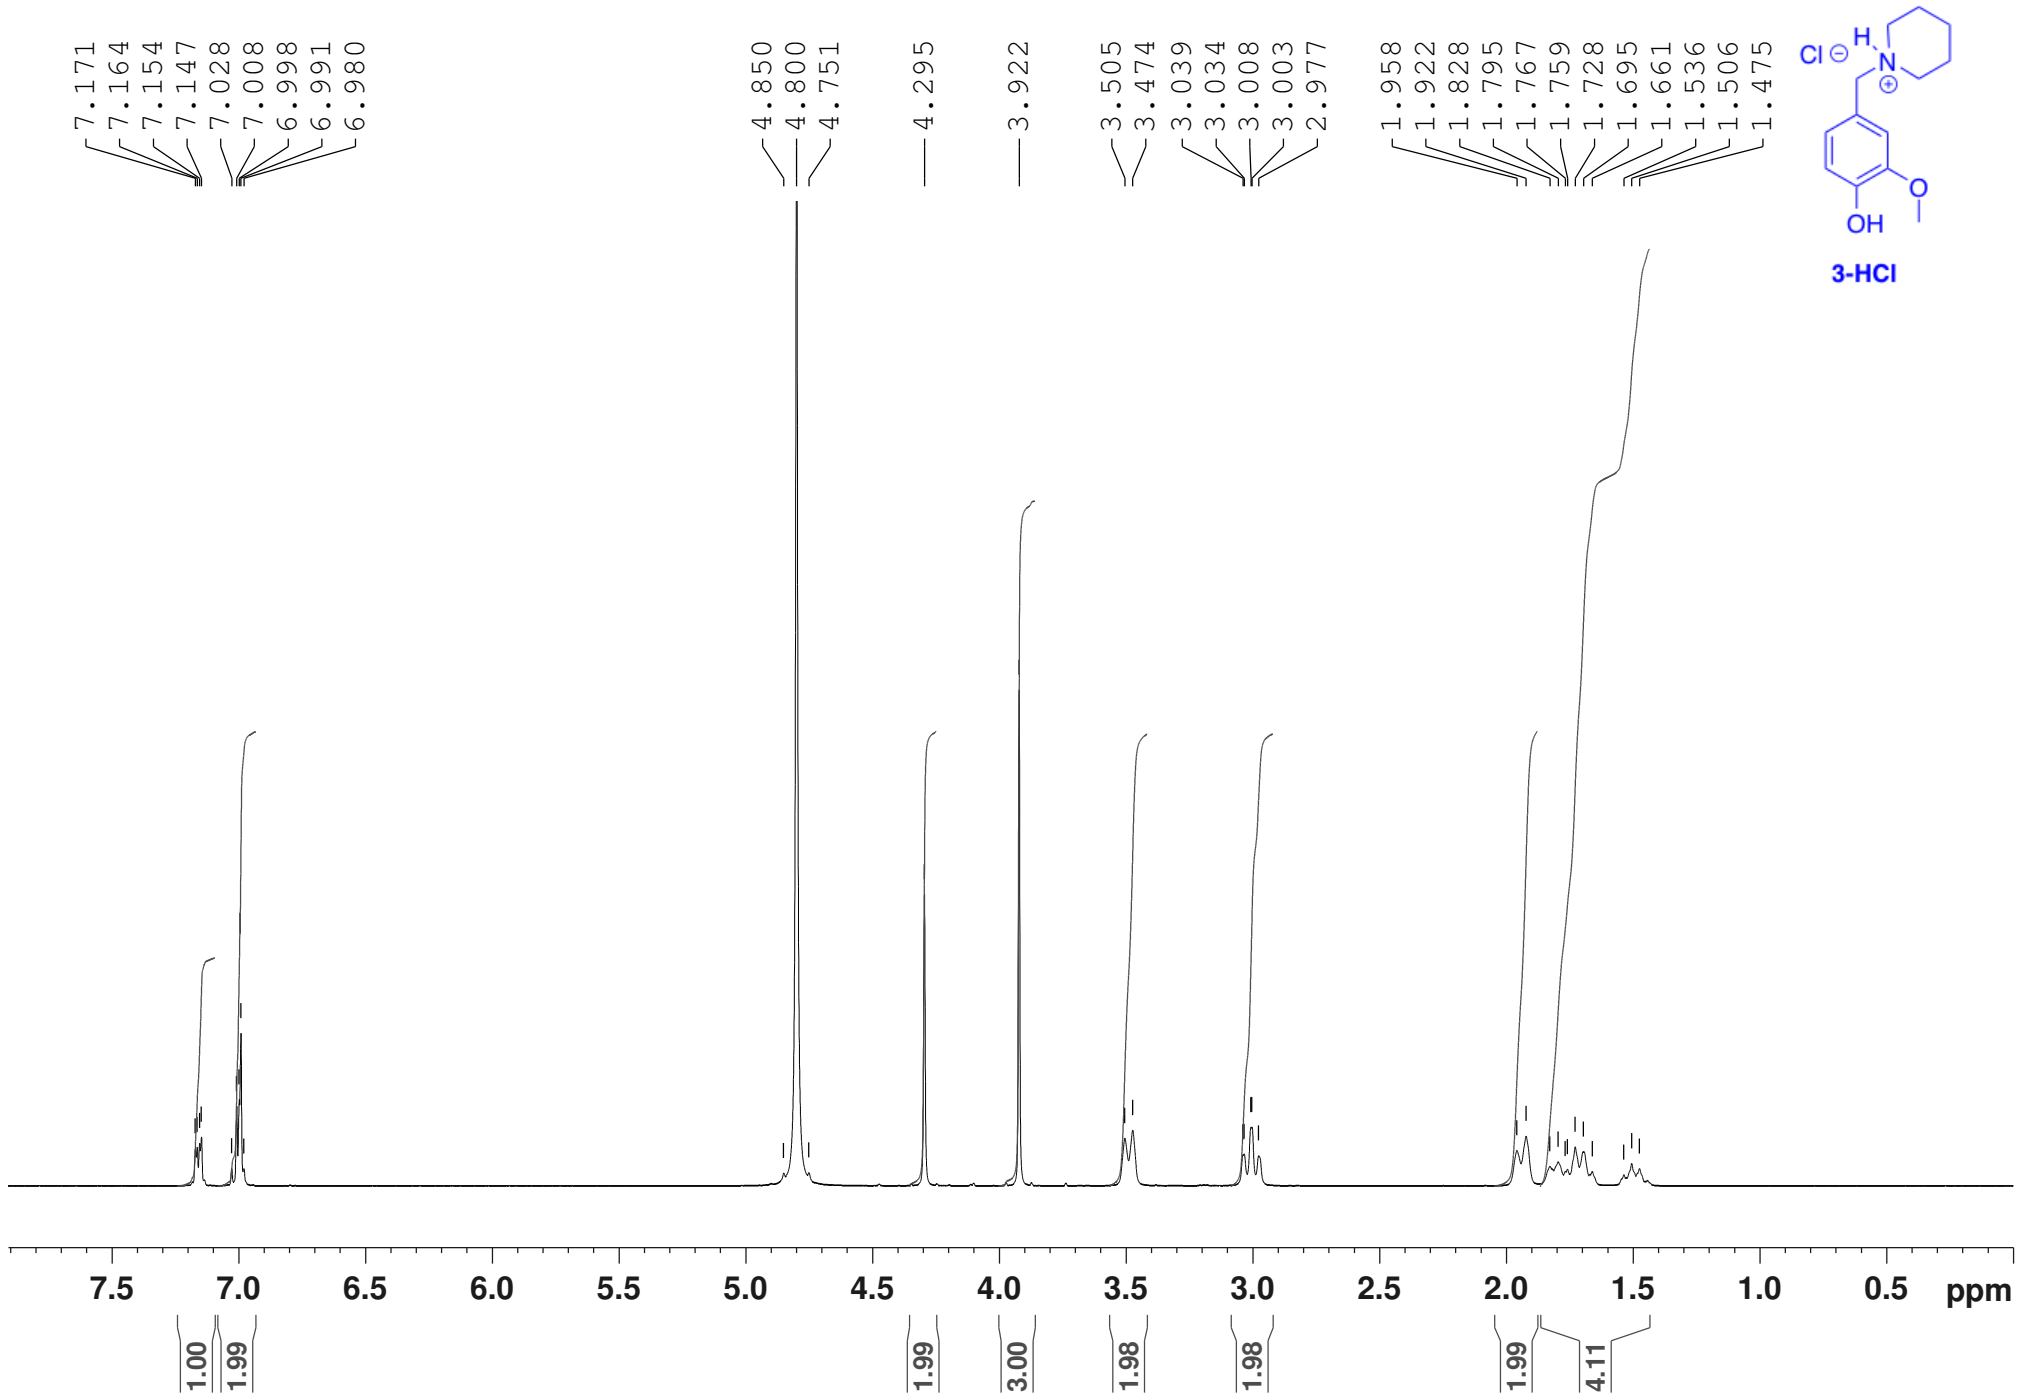

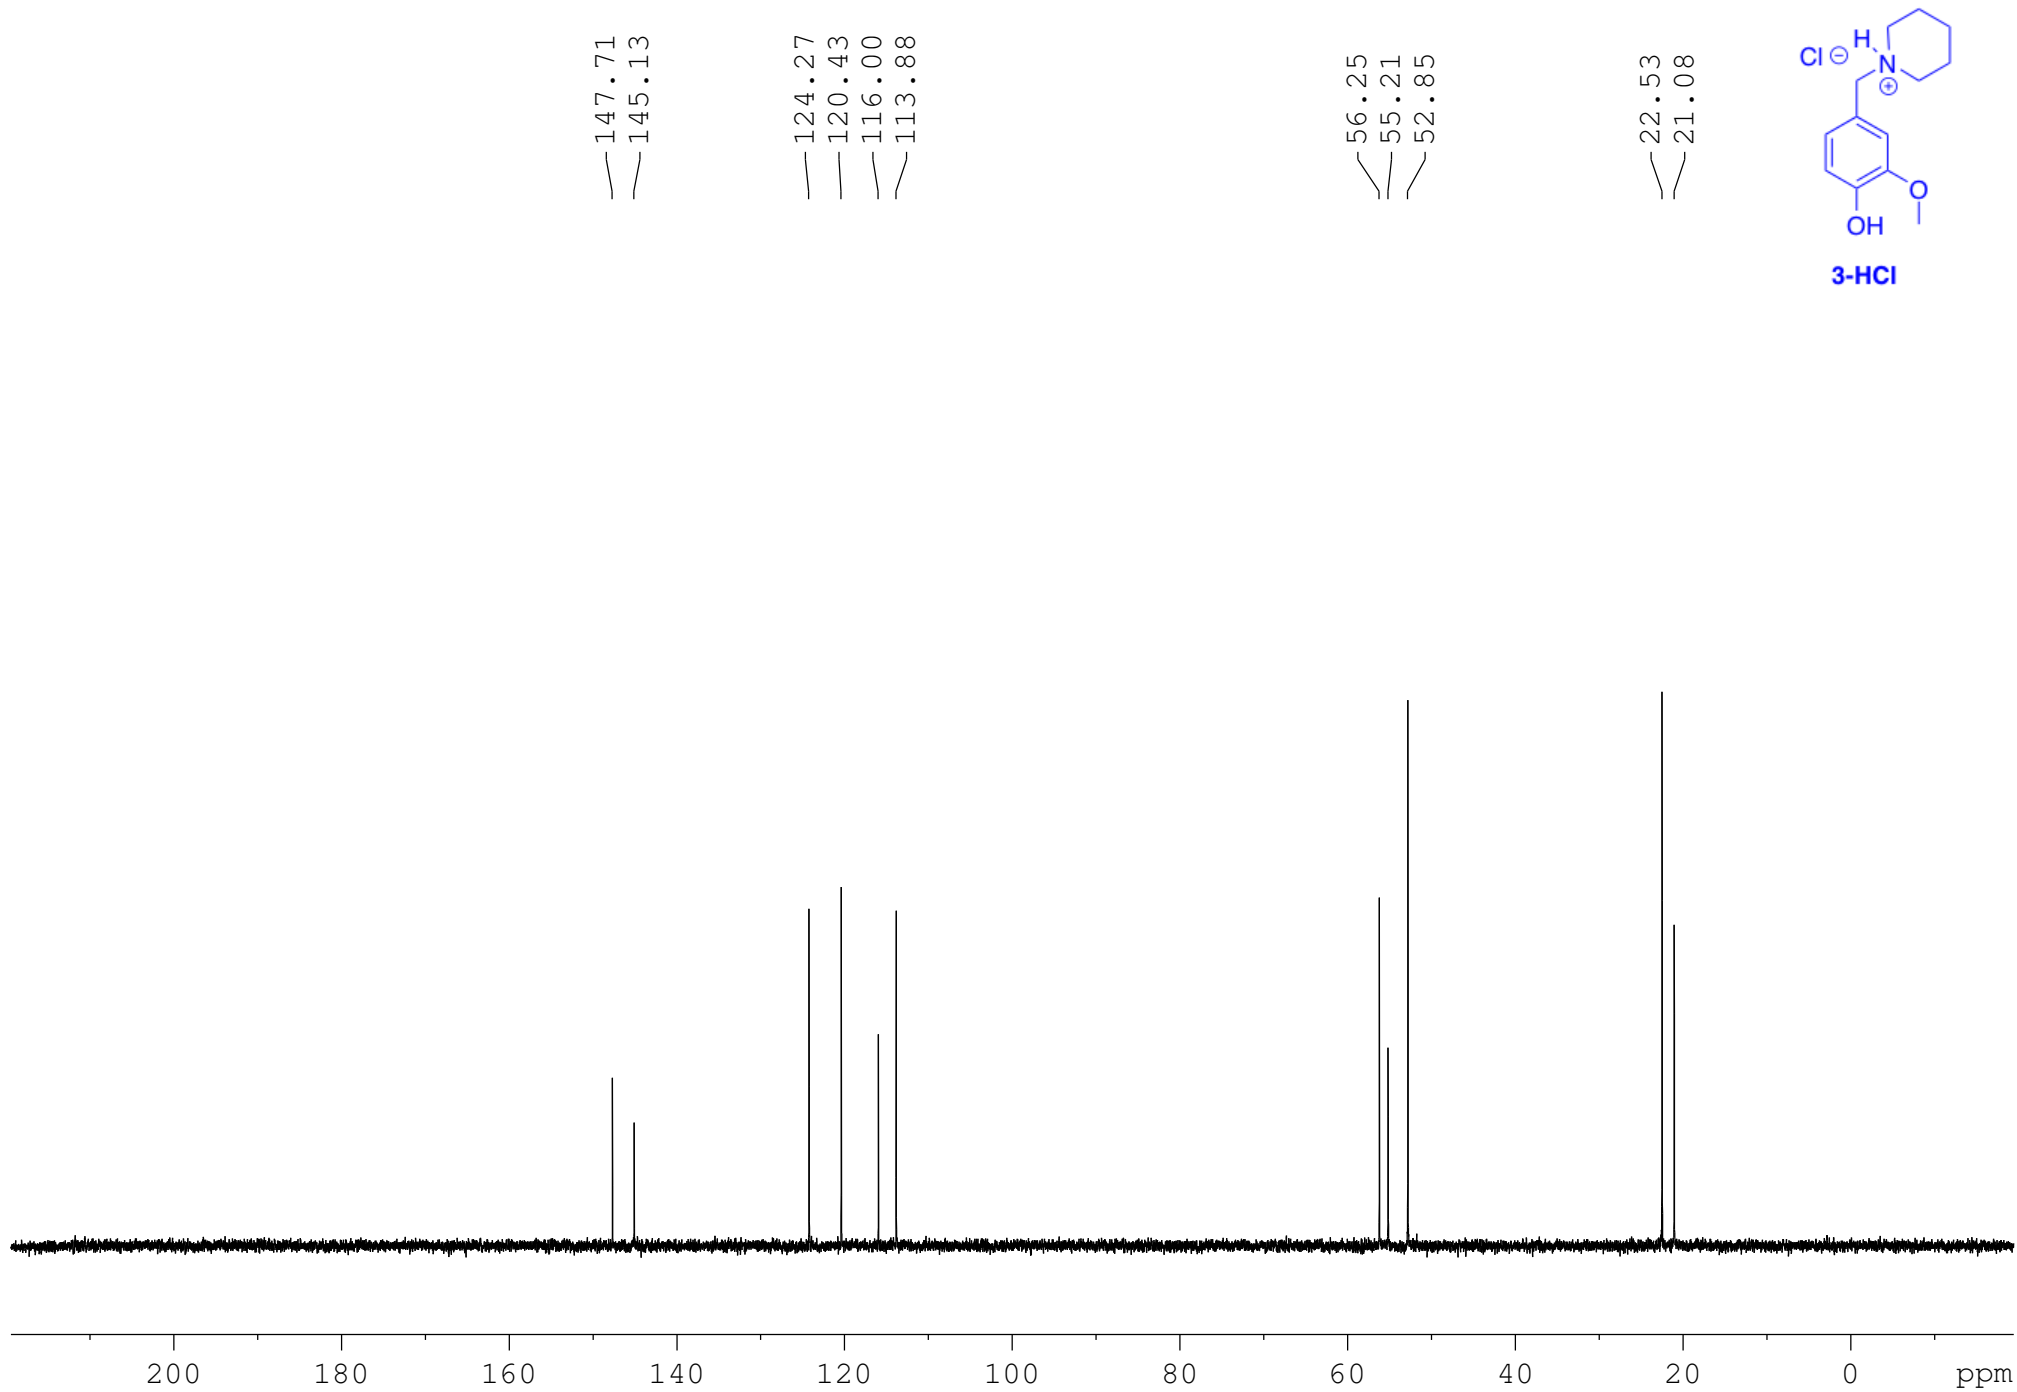

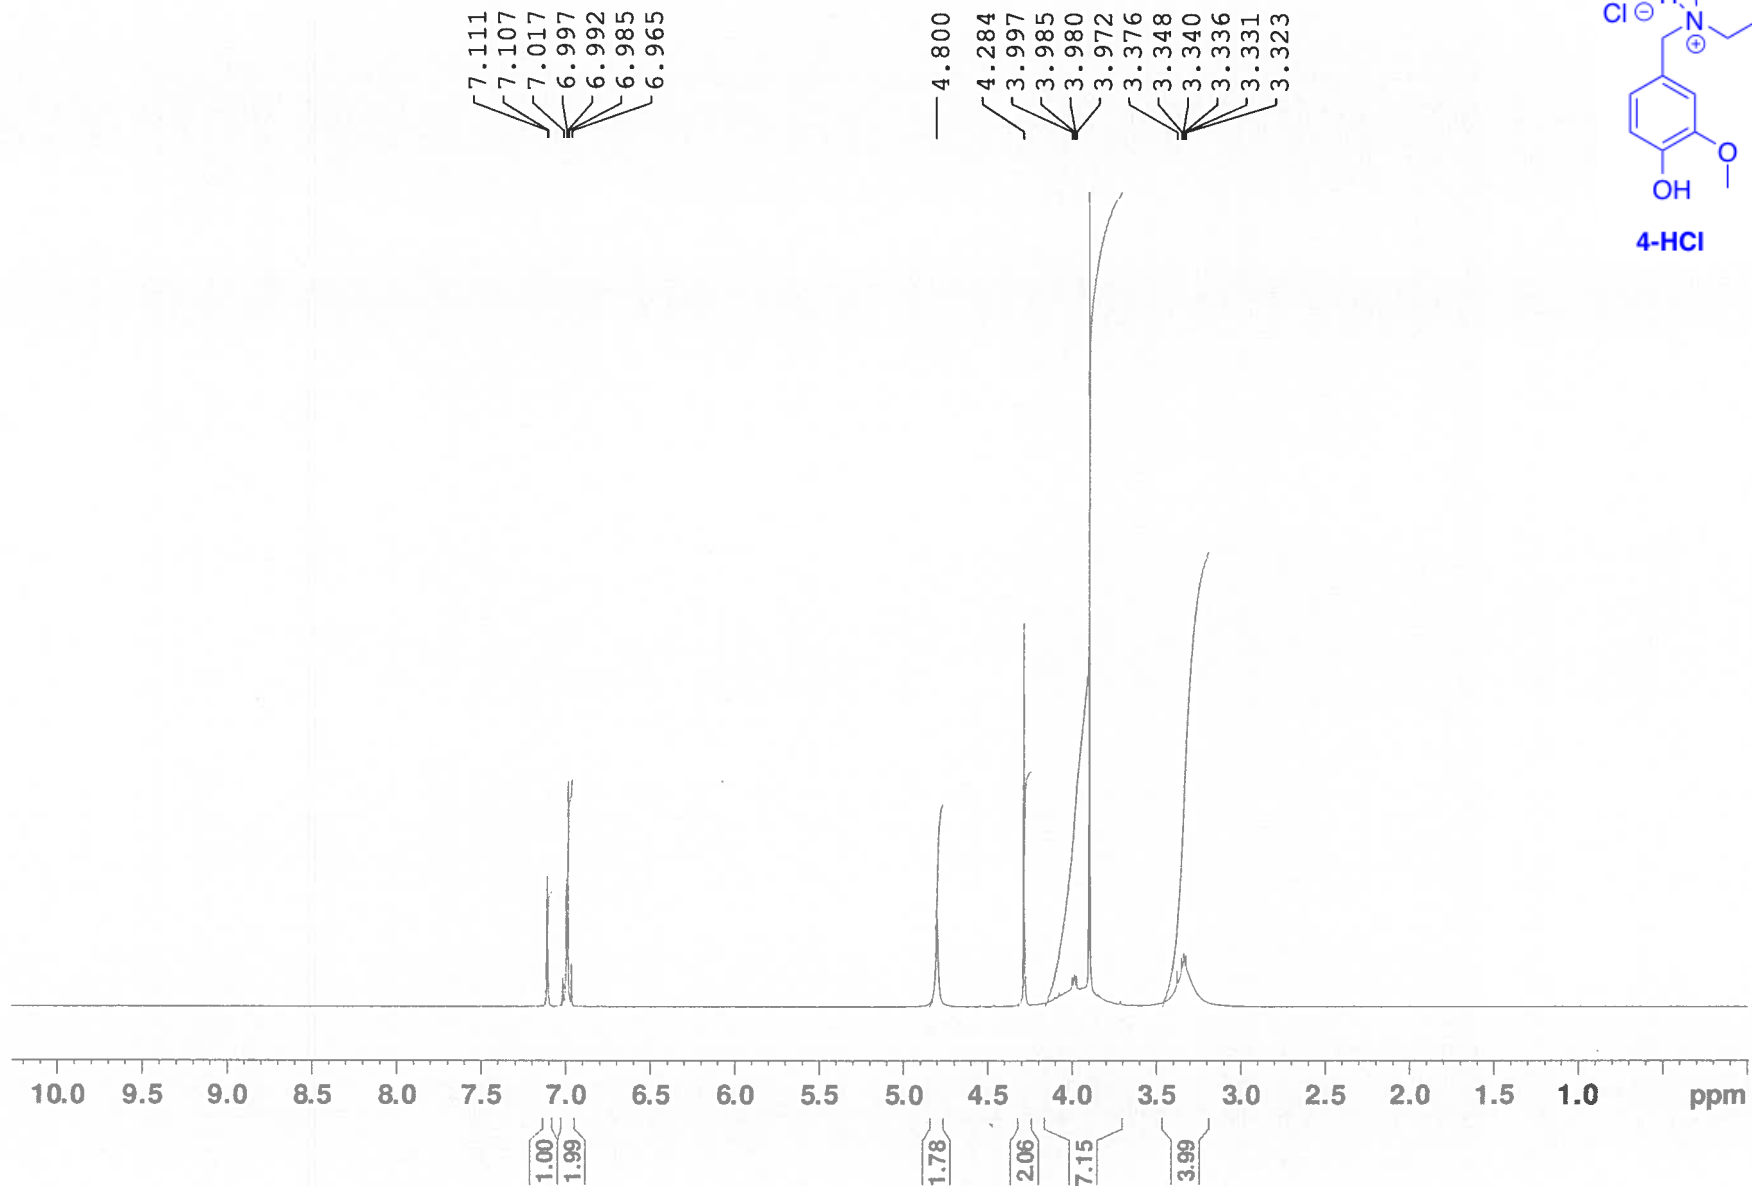

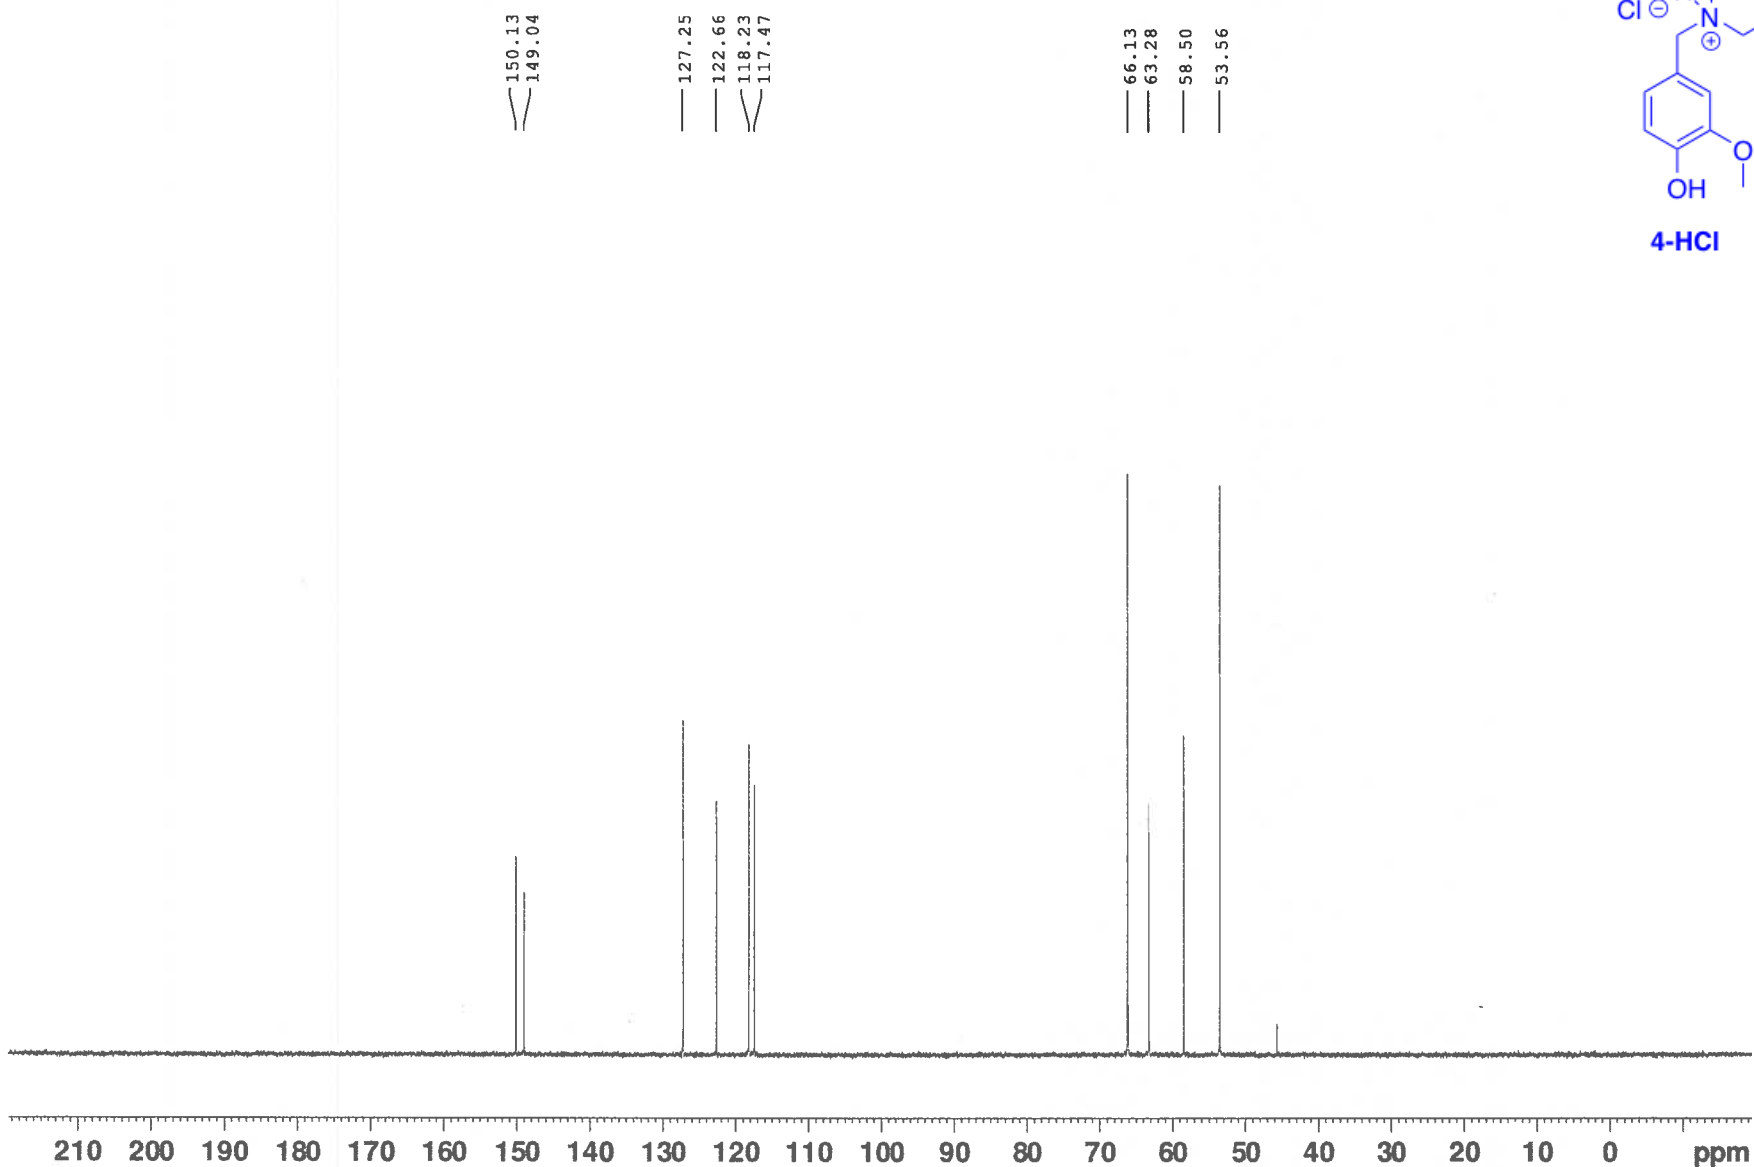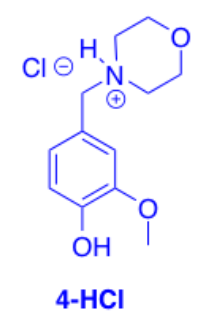

Supplement: ml7b00037_si_002.pdf [file ml7b00037_si_002.pdf]
